# Supplementary material
Source: HighWire-hosted journal article supplement (https://www.life-science-alliance.org/content/2/5/e201900495/F1)
Supplement: inline-supplementary-material-1 [file inline-supplementary-material-1.pdf]

~~PK00051~~ / 143 / 248 / 249

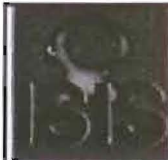

Print Pedigree Report

### Specimen Report

November 15, 2002 10:06:27 AM

## Species Information System

### Specimen SD-WAP/694047

| Names:              |                        |                        |                    |                     |                           |              |
|---------------------|------------------------|------------------------|--------------------|---------------------|---------------------------|--------------|
| <b>Taxonomic:</b>   | <b>Common:</b>         | <b>Family:</b>         | <b>Order:</b>      |                     |                           |              |
| <i>Pan paniscus</i> | Pygmy chimpanzee       | Hominidae              | Primates           |                     |                           |              |
| Birth Information:  |                        |                        |                    |                     |                           |              |
| <b>Sex:</b>         | <b>Birth Location:</b> | <b>Birth date:</b>     | <b>Birth type:</b> | <b>Hybrid:</b>      | <b>Rearing:</b>           |              |
| Female              | SD-WAP                 | 8 Feb 1994             | Captive born       |                     |                           |              |
| Visits:             |                        |                        |                    |                     |                           |              |
| <b>Date:</b>        | <b>Aquisition:</b>     | <b>Vendor/LocalID:</b> | <b>Holder:</b>     | <b>Disposition:</b> | <b>Recipient/LocalID:</b> | <b>Date:</b> |
| 8 Feb 1994          | Birth                  |                        | SD-WAP/694047      |                     |                           |              |
| Identification:     |                        |                        |                    |                     |                           |              |
| <b>Date:</b>        | <b>Type:</b>           | <b>Identifier:</b>     | <b>Location:</b>   | <b>Comments:</b>    |                           |              |
| 8 Feb 1994          | House Name             | MALELA                 |                    | at SD-WAP           |                           |              |
| 7 Oct 1998          | Transponder ID         | 00012183DB             |                    | at SD-WAP           |                           |              |
| Sex Information:    |                        |                        |                    |                     |                           |              |
| <b>Date:</b>        | <b>Sex:</b>            | <b>Comments:</b>       |                    |                     |                           |              |
| 8 Feb 1994          | Female                 | at SD-WAP              |                    |                     |                           |              |
| Parents:            |                        |                        |                    |                     |                           |              |
| <b>Date:</b>        | <b>Parent type:</b>    | <b>ID:</b>             | <b>Location:</b>   | <b>Comments:</b>    |                           |              |
| 8 Feb 1994          | Sire                   | 181056                 | SD-WAP             | while at SD-WAP     |                           |              |
| 8 Feb 1994          | Dam                    | 282014                 | SD-WAP             | while at SD-WAP     |                           |              |

# Specimen Report

SIRE

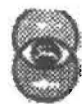

ISIS GAN: MIG12-29876876

181056

Pan paniscus

Bonobo

Pan paniscus

Order: Primates

Family: Hominidae

Start Date: Jan 01, 1800

End Date: Sep 14, 2012

**Basic Animal Information**

|                      |                                      |                  |                           |
|----------------------|--------------------------------------|------------------|---------------------------|
| Sex - Contraception: | Male -                               | Status:          | Allve                     |
| Birthdate - Age:     | Jul 02, 1980 - 32Y,2M,15D            | Preferred ID:    | 181056                    |
| Origin:              | Yerkes National Primate Research Ctr | Rearing:         | Undetermined              |
| Birth Type:          | Captive Born                         | Hybrid Status:   | Not a hybrid              |
| Sire:                | MULTIPLE                             | Dam:             | MIG12-25333283; YERKES P1 |
| Current Collection:  | Main Institution Animal Collection   | Collection Trip: |                           |

**Physical History:**

| Reported By | Date         | Source / ID        | Holder / ID        | Term Type                                         | Recipient / ID     |
|-------------|--------------|--------------------|--------------------|---------------------------------------------------|--------------------|
| YERKES      | Jul 02, 1980 |                    | YERKES / P6        | Birth/Hatch (Physical and Ownership)              |                    |
| SANDIEGOZ   | Mar 26, 1981 | YERKES / P6        | SANDIEGOZ / 181056 | Trade From (Physical and Ownership)               |                    |
| YERKES      | Mar 26, 1981 |                    | YERKES / P6        | Donation To (Physical and Ownership)              | SANDIEGOZ / 181056 |
| SANDIEGOZ   | Jul 11, 1989 |                    | SANDIEGOZ / 181056 | Undetermined (Physical and Ownership)             | SD-WAP / 181056    |
| SD-WAP      | Jul 11, 1989 | SANDIEGOZ / 181056 | SD-WAP / 181056    | Undetermined (Physical and Ownership)             |                    |
| JACKSONVL   | Oct 23, 2008 |                    | JACKSONVL / 808387 | Loan In From (Physical Only)                      |                    |
| SD-WAP      | Oct 23, 2008 |                    | SD-WAP / 181056    | Loan Out To (Initial Transaction - Physical Only) | JACKSONVL / 808387 |

**Ownership History:**

| Reported By | Date         | Source / ID        | Owner / ID         | Term Type                             | Recipient / ID     |
|-------------|--------------|--------------------|--------------------|---------------------------------------|--------------------|
| YERKES      | Jul 02, 1980 |                    | YERKES / P6        | Birth/Hatch (Physical and Ownership)  |                    |
| SANDIEGOZ   | Mar 26, 1981 | YERKES / P6        | SANDIEGOZ / 181056 | Trade From (Physical and Ownership)   |                    |
| YERKES      | Mar 26, 1981 |                    | YERKES / P6        | Donation To (Physical and Ownership)  | SANDIEGOZ / 181056 |
| SANDIEGOZ   | Jul 11, 1989 |                    | SANDIEGOZ / 181056 | Undetermined (Physical and Ownership) | SD-WAP / 181056    |
| SD-WAP      | Jul 11, 1989 | SANDIEGOZ / 181056 | SD-WAP / 181056    | Undetermined (Physical and Ownership) |                    |
| JACKSONVL   | Oct 23, 2008 |                    | SD-WAP / 181056    | Reported Owner                        |                    |
| SD-WAP      | Oct 23, 2008 |                    | SD-WAP / 181056    | Reported Owner                        |                    |



| Reported By | Date         | Type          | Identifier   | Location | Comments                                                             |
|-------------|--------------|---------------|--------------|----------|----------------------------------------------------------------------|
| JACKSONVL   | Oct 23, 2008 | Local ID      | 808387       |          |                                                                      |
| JACKSONVL   | Oct 07, 1998 | Transponder   | 00-0121-29FF |          | Legacy SLocation:<br>Legacy Comment: Trovan                          |
| SD-WAP      | Oct 07, 1998 | Transponder   | 00012129FF   |          |                                                                      |
| JACKSONVL   | Mar 26, 1981 | ID elsewhere  | 181056       |          | Legacy SLocation: SANDIEGOZ<br>Legacy Comment: at San Diego Zoo      |
| SANDIEGOZ   | Mar 26, 1981 | Tattoo        | SB94         |          |                                                                      |
| SANDIEGOZ   | Mar 26, 1981 | House Name    | AKILI        |          |                                                                      |
| JACKSONVL   | Mar 26, 1981 | Tattoo        | SB94         |          |                                                                      |
| JACKSONVL   | Jul 02, 1980 | Studbook Name | YERK 1       |          |                                                                      |
| YERKES      | Jul 02, 1980 | House Name    | AKILI        |          |                                                                      |
| JACKSONVL   | Jul 02, 1980 | House Name    | AKILI        |          |                                                                      |
| YERKES      | Jul 02, 1980 | Intl Stdbk#   | 94           |          |                                                                      |
| JACKSONVL   | Jul 02, 1980 | Intl Stdbk#   | 0094         |          |                                                                      |
| JACKSONVL   | Jul 02, 1980 | ID elsewhere  | P6           |          | Legacy SLocation: YERKES<br>Legacy Comment: at Yerkes Primate Center |
| YERKES      | Jul 02, 1980 | Studbook Name | YERK 1       |          |                                                                      |
| YERKES      |              | Local ID      | P6           |          |                                                                      |
| SD-WAP      |              | Local ID      | 181056       |          |                                                                      |
| SANDIEGOZ   |              | Local ID      | 181056       |          |                                                                      |

**Sex Information:**

| Reported By | Date         | Sex  | Comments |
|-------------|--------------|------|----------|
| JACKSONVL   | Oct 23, 2008 | Male |          |
| YERKES      | Jul 02, 1980 | Male |          |

**Parent Info:**

| In ZIMS | Parent Info    | Type / Probability | Birth Date   | Reported By |
|---------|----------------|--------------------|--------------|-------------|
| True    | MIG12-25333283 | Dam/100%           | Mar 26, 1970 | JACKSONVL   |
| True    | MIG12-25333283 | Dam/100%           | Mar 26, 1970 | YERKES      |
| True    | 4893096        | Sire/100%          | Jan 01, 1971 | YERKES      |
| False   | P4/YERKES      | Sire/100%          |              | JACKSONVL   |

# Specimen Report

FATHER OF  
SIPE

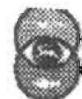

ISIS GAN: 4893096

Pan paniscus

Bonobo

Order: Primates

Family: Hominidae

Start Date: Jan 01, 1800

End Date: Sep 14, 2012

### Basic Animal Information

|                      |                                         |                  |                |
|----------------------|-----------------------------------------|------------------|----------------|
| Sex - Contraception: | Male -                                  | Status:          | Dead           |
| Birthdate - Age:     | Jan 01, 1971 - 34Y,6M,21D               | Preferred ID:    |                |
| Origin:              | Congo, The Democratic Republic Of The - | Rearing:         | Parent         |
| Birth Type:          | Wild Born                               | Hybrid Status:   | Not a hybrid   |
| Sire:                | JACKSONVL WILD                          | Dam:             | JACKSONVL WILD |
| Current Collection:  |                                         | Collection Trip: |                |
| Clutch / Litter:     |                                         |                  |                |

### Physical History:

| Reported By | Date         | Source / ID    | Holder / ID        | Term Type                                         | Recipient / ID  |
|-------------|--------------|----------------|--------------------|---------------------------------------------------|-----------------|
| YERKES      | Mar 27, 1975 | KINSHASA / UNK | YERKES / P4        | Donation From (Physical and Ownership)            |                 |
| YERKES      | Apr 15, 1998 |                | YERKES / P4        | Loan Out To (Initial Transaction - Physical Only) | JACKSONVL / UNK |
| JACKSONVL   | Apr 15, 1998 |                | JACKSONVL / 898051 | Loan In From (Physical Only)                      |                 |
| JACKSONVL   | Jul 22, 2005 |                | JACKSONVL / 898051 | Death (Physical and Ownership)                    |                 |

### Ownership History:

| Reported By | Date         | Source / ID    | Owner / ID         | Term Type                              | Recipient / ID |
|-------------|--------------|----------------|--------------------|----------------------------------------|----------------|
| YERKES      | Mar 27, 1975 | KINSHASA / UNK | YERKES / P4        | Donation From (Physical and Ownership) |                |
| YERKES      | Apr 15, 1998 |                | YERKES / P4        | Reported Owner                         |                |
| JACKSONVL   | Apr 15, 1998 |                | YERKES / P4        | Reported Owner                         |                |
| YERKES      | Jul 27, 1999 |                | YERKES / P4        | Donation To (Ownership Only)           | JACKSONVL /    |
| JACKSONVL   | Sep 07, 1999 | YERKES / P4    | JACKSONVL / 898051 | Donation From (Ownership Only)         |                |
| JACKSONVL   | Jul 22, 2005 |                | JACKSONVL / 898051 | Death (Physical and Ownership)         |                |

### Identifiers:

| Reported By | Date         | Type        | Identifier | Location | Comments |
|-------------|--------------|-------------|------------|----------|----------|
| JACKSONVL   | Apr 15, 1998 | Local ID    | 898051     |          |          |
| YERKES      | Mar 27, 1975 | House Name  | BOSONDJO   |          |          |
| JACKSONVL   | Mar 27, 1975 | House Name  | BOSONDJO   |          |          |
| JACKSONVL   | Mar 27, 1975 | Intl Stdbk# | 64         |          |          |
| YERKES      | Mar 27, 1975 | Intl Stdbk# | 64         |          |          |
| YERKES      |              | Local ID    | P4         |          |          |



| Reported By | Date         | Sex  | Comments |
|-------------|--------------|------|----------|
| JACKSONVL   | Apr 15, 1998 | Male |          |
| YERKES      | Mar 27, 1975 | Male |          |

**Parent Info:**

| In ZIMS | Parent Info    | Type / Probability | Birth Data | Reported By |
|---------|----------------|--------------------|------------|-------------|
| False   | WILD/230900000 | Dam/100%           |            | JACKSONVL   |
| False   | WILD/230900000 | Sire/100%          |            | JACKSONVL   |

**Death Information:**

| Reported By | Death Type   | Date | Carcass Disposition | Necropsy Topology      | Necropsy Etiological |
|-------------|--------------|------|---------------------|------------------------|----------------------|
| JACKSONVL   | Undetermined |      | Undetermined        | Necropsy Planned Later | Indeterminate        |

Circumstance of death: Other/Unknown; Carcass disposition: Unknown; Carcass recipient: (not supplied); Necropsy - Topological: Necropsy Planned Later; Necropsy - Etiological: (not supplied)

| Body Part | Institution | Recipient ID | Date Sent | Date Received | Genetic Results |
|-----------|-------------|--------------|-----------|---------------|-----------------|
|           |             |              |           |               |                 |

# Specimen Report

MOTHER OF  
SIRE

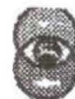

ISIS GAN: MIG12-25333283

Pan paniscus Bonobo

Order: Primates Family: Homnidae

Start Date: Jan 01, 1800 End Date: Sep 14, 2012

**Basic Animal Information**

|                      |                                                                                |                  |              |
|----------------------|--------------------------------------------------------------------------------|------------------|--------------|
| Sex - Contraception: | Female - Undetermined/Active                                                   | Status:          | Alive        |
| Birthdate - Age:     | <span style="background-color: yellow;">Mar 26, 1970 - 42Y,5M,21D +/-2Y</span> | Preferred ID:    |              |
| Origin:              | Unknown Location                                                               | Rearing:         | Parent       |
| Birth Type:          | Wild Born                                                                      | Hybrid Status:   | Not a hybrid |
| Sire:                | MULTIPLE                                                                       | Dam:             | MULTIPLE     |
| Current Collection:  |                                                                                | Collection Trip: |              |
| Clutch / Litter:     |                                                                                |                  |              |
| Physical History:    |                                                                                |                  |              |

| Reported By | Date         | Source / ID | Holder / ID      | Term Type                                         | Recipient / ID   |
|-------------|--------------|-------------|------------------|---------------------------------------------------|------------------|
| YERKES      | Mar 27, 1975 |             | YERKES / P1      | Loan In From (Physical Only)                      |                  |
| YERKES      | May 04, 2000 |             | YERKES / P1      | Donation To (Physical and Ownership)              | ATLANTA / A01013 |
| ATLANTA     | May 04, 2000 | YERKES / P1 | ATLANTA / A01013 | Donation From (Physical and Ownership)            |                  |
| ATLANTA     | May 04, 2000 |             | ATLANTA / A01013 | Loan Out To (Initial Transaction - Physical Only) | LCR / NONE       |
| GATI        | May 14, 2005 |             | GATI / 9         | Loan In From (Physical Only)                      |                  |

**Ownership History:**

| Reported By | Date         | Source / ID | Owner / ID       | Term Type                              | Recipient / ID   |
|-------------|--------------|-------------|------------------|----------------------------------------|------------------|
| YERKES      | Mar 27, 1975 |             | KINSHASA / UNK   | Reported Owner                         |                  |
| YERKES      | Aug 21, 1991 | KINSHASA /  | YERKES / P1      | Donation From (Ownership Only)         |                  |
| YERKES      | May 04, 2000 |             | YERKES / P1      | Donation To (Physical and Ownership)   | ATLANTA / A01013 |
| ATLANTA     | May 04, 2000 | YERKES / P1 | ATLANTA / A01013 | Donation From (Physical and Ownership) |                  |
| ATLANTA     | May 04, 2000 |             | ATLANTA / A01013 | Reported Owner                         |                  |
| GATI        | May 14, 2005 |             | ATLANTA / A01013 | Reported Owner                         |                  |



| Reported By | Date         | Type        | Identifier | Location | Comments |
|-------------|--------------|-------------|------------|----------|----------|
| GATI        | May 14, 2005 | House Name  | Matata     |          |          |
| GATI        | May 09, 2005 | Intl Stdbk# | 62         |          |          |
| ATLANTA     | May 04, 2000 | House Name  | Matata     |          |          |
| ATLANTA     | May 04, 2000 | Intl Stdbk# | 62         |          |          |
| YERKES      | Mar 27, 1975 | Intl Stdbk# | 62         |          |          |
| YERKES      | Mar 27, 1975 | House Name  | MATATA     |          |          |
| ATLANTA     |              | Local ID    | A01013     |          |          |
| GATI        |              | Local ID    | 9          |          |          |
| YERKES      |              | Local ID    | P1         |          |          |

**Sex Information:**

| Reported By | Date         | Sex    | Comments |
|-------------|--------------|--------|----------|
| YERKES      | Mar 27, 1975 | Female |          |

**Parent Info:**

| In ZIMS | Parent Info | Type / Probability | Birth Date | Reported By |
|---------|-------------|--------------------|------------|-------------|
| False   | WILD/       |                    |            | ATLANTA     |
| False   | WILD/       |                    |            | YERKES      |
| False   | WILD/       |                    |            | GATI        |
| False   | WILD/       |                    |            | GATI        |
| False   | WILD/       |                    |            | YERKES      |
| False   | WILD/       |                    |            | ATLANTA     |

# Specimen Report

DAM

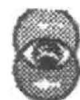

ISIS GAN: 26298915

282014

Pan paniscus

Bonobo

Pan paniscus

Order: Primates

Family: Hominidae

Start Date: Jan 01, 1800

End Date: Sep 14, 2012

**Basic Animal Information**

|                                                               |                                         |
|---------------------------------------------------------------|-----------------------------------------|
| <b>Sex - Contraception:</b> Female -                          | <b>Status:</b> Alive                    |
| <b>Birthdate - Age:</b> Feb 03, 1982 - 10Y,5M,21D             | <b>Preferred ID:</b> 282014             |
| <b>Origin:</b> San Diego Zoo                                  | <b>Rearing:</b> Undetermined            |
| <b>Birth Type:</b> Captive Born                               | <b>Hybrid Status:</b> Not a hybrid      |
| <b>Sire:</b> MIG12-26751591   SANDIEGOZ 180343                | <b>Dam:</b> 27751557   SANDIEGOZ 172284 |
| <b>Current Collection:</b> Main Institution Animal Collection | <b>Collection Trip:</b>                 |
| <b>Clutch / Litter:</b>                                       |                                         |

**Physical History:**

| Reported By | Date         | Source / ID        | Holder / ID        | Term Type                                         | Recipient / ID     |
|-------------|--------------|--------------------|--------------------|---------------------------------------------------|--------------------|
| SANDIEGOZ   | Feb 03, 1982 |                    | SANDIEGOZ / 282014 | Birth/Hatch (Physical and Ownership)              |                    |
| SANDIEGOZ   | Jun 20, 1988 |                    | SANDIEGOZ / 282014 | Loan Out To (Initial Transaction - Physical Only) | CINCINNAT / M5062  |
| CINCINNAT   | Jun 21, 1988 |                    | CINCINNAT / M5062  | Loan In From (Physical Only)                      |                    |
| CINCINNAT   | Jul 02, 1992 |                    | CINCINNAT / M5062  | Loan Return to Owner (Physical Only)              | SANDIEGOZ / 282014 |
| SANDIEGOZ   | Jul 02, 1992 | CINCINNAT / M5062  | SANDIEGOZ / 282014 | Loan Return to Us (Physical Only)                 |                    |
| SANDIEGOZ   | Jul 24, 1992 |                    | SANDIEGOZ / 282014 | Undetermined (Physical and Ownership)             | SD-WAP / 282014    |
| SD-WAP      | Jul 24, 1992 | SANDIEGOZ / 282014 | SD-WAP / 282014    | Undetermined (Physical and Ownership)             |                    |

**Ownership History:**

| Reported By | Date         | Source / ID        | Owner / ID         | Term Type                             | Recipient / ID  |
|-------------|--------------|--------------------|--------------------|---------------------------------------|-----------------|
| SANDIEGOZ   | Feb 03, 1982 |                    | SANDIEGOZ / 282014 | Birth/Hatch (Physical and Ownership)  |                 |
| SANDIEGOZ   | Jun 20, 1988 |                    | SANDIEGOZ / 282014 | Reported Owner                        |                 |
| CINCINNAT   | Jun 21, 1988 |                    | SANDIEGOZ / 282014 | Reported Owner                        |                 |
| SANDIEGOZ   | Jul 24, 1992 |                    | SANDIEGOZ / 282014 | Undetermined (Physical and Ownership) | SD-WAP / 282014 |
| SD-WAP      | Jul 24, 1992 | SANDIEGOZ / 282014 | SD-WAP / 282014    | Undetermined (Physical and Ownership) |                 |



| Reported By | Date         | Type                     | Identifier    | Location | Comments                                                                                                      |
|-------------|--------------|--------------------------|---------------|----------|---------------------------------------------------------------------------------------------------------------|
| SD-WAP      | Oct 07, 1998 | Transponder              | 0001217E79    |          |                                                                                                               |
| SANDIEGOZ   | Jul 02, 1992 | Tattoo                   | SB108         |          |                                                                                                               |
| SANDIEGOZ   | Jul 02, 1992 | House Name               | CONNIE-LENORE |          |                                                                                                               |
| CINCINNAT   | Jun 21, 1988 | House Name               | LENORE        |          |                                                                                                               |
| CINCINNAT   | Jun 21, 1988 | Regional Studbook Number | 108           |          | Legacy SLocation: UNKNOWN STUDBOOK<br>Legacy Comment: 108 "International Studbook Number" from ARKS 2 records |
| CINCINNAT   | Jun 21, 1988 | Studbook Name            | SAND12        |          |                                                                                                               |
| CINCINNAT   | Jun 21, 1988 | Local ID                 | M5062         |          |                                                                                                               |
| SD-WAP      |              | Local ID                 | 282014        |          |                                                                                                               |
| SANDIEGOZ   |              | Local ID                 | 282014        |          |                                                                                                               |

**Sex Information:**

| Reported By | Date         | Sex    | Comments |
|-------------|--------------|--------|----------|
| CINCINNAT   | Jun 21, 1988 | Female |          |
| SANDIEGOZ   | Feb 03, 1982 | Female |          |

**Parent Info:**

| In ZIMS | Parent Info    | Type / Probability | Birth Date   | Reported By |
|---------|----------------|--------------------|--------------|-------------|
| True    | 27751557       | Dam/100%           | Oct 28, 1972 | SANDIEGOZ   |
| True    | MIG12-26751591 | Sire/100%          | Dec 12, 1972 | SANDIEGOZ   |

# Specimen Report

**FATHER OF  
DAM**

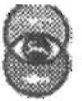

**ISIS GAN:** MIG12-26751591      180343  
**Pan paniscus**      Bonobo      Pan paniscus  
**Order:** Primates      **Family:** Hominidae  
**Start Date:** Jan 01, 1800      **End Date:** Sep 14, 2012

**Basic Animal Information**

|                             |                                    |                         |                                         |
|-----------------------------|------------------------------------|-------------------------|-----------------------------------------|
| <b>Sex - Contraception:</b> | Male -                             | <b>Status:</b>          | Pending Confirmation (more than 1 year) |
| <b>Birthdate - Age:</b>     | Dec 12, 1972 - 40Y,9M,3D +/-1Y     | <b>Preferred ID:</b>    | 180343                                  |
| <b>Origin:</b>              | ZAIRE                              | <b>Rearing:</b>         | Parent                                  |
| <b>Birth Type:</b>          | Wild Born                          | <b>Hybrid Status:</b>   | Not a hybrid                            |
| <b>Sire:</b>                |                                    | <b>Dam:</b>             |                                         |
| <b>Current Collection:</b>  | Main Institution Animal Collection | <b>Collection Trip:</b> |                                         |
| <b>Clutch / Litter:</b>     |                                    |                         |                                         |

**Physical History:**

| Reported By | Date         | Source / ID      | Holder / ID        | Term Type                                         | Recipient / ID     |
|-------------|--------------|------------------|--------------------|---------------------------------------------------|--------------------|
| STUTTGART   | Dec 13, 1973 | 230903000 /      | STUTTGART / 2542   | Collected from the Wild(Physical and Ownership)   |                    |
| SANDIEGOZ   | Dec 15, 1980 |                  | SANDIEGOZ / 180343 | Loan In From (Physical Only)                      |                    |
| STUTTGART   | Dec 15, 1980 |                  | STUTTGART / 2542   | Loan Out To (Initial Transaction - Physical Only) | SANDIEGOZ / 180343 |
| SANDIEGOZ   | Jul 10, 1989 |                  | SANDIEGOZ / 180343 | Loan Transfer To (Physical Only)                  | SD-WAP / 180343    |
| SD-WAP      | Jul 10, 1989 |                  | SD-WAP / 180343    | Loan In From (Physical Only)                      |                    |
| SD-WAP      | Jan 23, 1992 |                  | SD-WAP / 180343    | Loan Transfer To (Physical Only)                  | CINCINNAT / 192008 |
| CINCINNAT   | Jan 25, 1992 |                  | CINCINNAT / 192008 | Loan In From (Physical Only)                      |                    |
| SD-WAP      | Oct 09, 1994 | STUTTGART / 2542 | SD-WAP / 180343    | Trade From(Physical and Ownership)                |                    |
| SD-WAP      | Oct 09, 1994 |                  | SD-WAP / 180343    | Loan Out To (Initial Transaction - Physical Only) | CINCINNAT / 192008 |

**Ownership History:**

| Reported By | Date         | Source / ID      | Owner / ID       | Term Type                                       | Recipient / ID     |
|-------------|--------------|------------------|------------------|-------------------------------------------------|--------------------|
| STUTTGART   | Dec 13, 1973 | 230903000 /      | STUTTGART / 2542 | Collected from the Wild(Physical and Ownership) |                    |
| SANDIEGOZ   | Dec 15, 1980 |                  | STUTTGART / 2542 | Reported Owner                                  |                    |
| SD-WAP      | Jul 10, 1989 |                  | STUTTGART / 2542 | Reported Owner                                  |                    |
| CINCINNAT   | Jan 25, 1992 |                  | STUTTGART / 2542 | Reported Owner                                  |                    |
| SD-WAP      | Oct 09, 1994 | STUTTGART / 2542 | SD-WAP / 180343  | Trade From(Physical and Ownership)              |                    |
| SD-WAP      | Oct 09, 1994 |                  | SD-WAP / 180343  | Reported Owner                                  |                    |
| STUTTGART   | Oct 10, 1994 |                  | STUTTGART / 2542 | Trade To (Ownership Only)                       | SANDIEGOZ / 180343 |



| Reported By | Date         | Type                           | Identifier | Location | Comments                                            |
|-------------|--------------|--------------------------------|------------|----------|-----------------------------------------------------|
| CINCINNAT   | Jul 23, 2002 | Tattoo                         | 58         |          | Legacy SLocation: rt inner thigh<br>Legacy Comment: |
| STUTT GART  | Nov 05, 1997 | Intl Stdbk#                    | 58         |          |                                                     |
| CINCINNAT   | Jan 25, 1992 | Local ID                       | 192008     |          |                                                     |
| SANDIEGOZ   | Dec 15, 1980 | Tattoo                         | SB58       |          |                                                     |
| STUTT GART  | Dec 13, 1973 | Local ID                       | 2542       |          |                                                     |
| STUTT GART  | Dec 13, 1973 | House Name                     | VERNON     |          |                                                     |
| SANDIEGOZ   | Dec 13, 1973 | House Name                     | VERNON     |          |                                                     |
| CINCINNAT   | Jan 30, 1972 | Regional<br>Studbook<br>Number | 58         |          | Legacy SLocation: AZA<br>Legacy Comment:            |
| CINCINNAT   | Jan 30, 1972 | House Name                     | VERNON     |          |                                                     |
| SANDIEGOZ   |              | Local ID                       | 180343     |          |                                                     |
| SD-WAP      |              | Local ID                       | 180343     |          |                                                     |

**Sex Information:**

| Reported By | Date         | Sex  | Comments |
|-------------|--------------|------|----------|
| CINCINNAT   | Jan 25, 1992 | Male |          |
| STUTT GART  | Dec 13, 1973 | Male |          |





# Specimen Report

MOTHER  
OF DAM

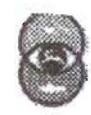

ISIS GAN: 27751557

172284

Pan paniscus

Bonobo

Pan paniscus

Order: Primates

Family: Hominidae

Start Date: Jan 01, 1800

End Date: Sep 14, 2012

**Basic Animal Information**

|                             |                                           |                         |              |
|-----------------------------|-------------------------------------------|-------------------------|--------------|
| <b>Sex - Contraception:</b> | Female - Medical Method - Hormonal/Active | <b>Status:</b>          | Alive        |
| <b>Birthdate - Age:</b>     | Oct 28, 1972 - 40Y,10M,17D                | <b>Preferred ID:</b>    | 172284       |
| <b>Origin:</b>              | San Diego Zoo                             | <b>Rearing:</b>         | Parent       |
| <b>Birth Type:</b>          | Captive Born                              | <b>Hybrid Status:</b>   | Not a Hybrid |
| <b>Sire:</b>                |                                           | <b>Dam:</b>             |              |
| <b>Current Collection:</b>  | Main Institution Animal Collection        | <b>Collection Trip:</b> |              |
| <b>Clutch / Litter:</b>     |                                           |                         |              |

**Physical History:**

| Reported By | Date         | Source / ID        | Holder / ID        | Term Type                                         | Recipient / ID     |
|-------------|--------------|--------------------|--------------------|---------------------------------------------------|--------------------|
| SANDIEGOZ   | Oct 28, 1972 |                    | SANDIEGOZ / 172284 | Birth/Hatch (Physical and Ownership)              |                    |
| SANDIEGOZ   | Jul 11, 1989 |                    | SANDIEGOZ / 172284 | Undetermined (Physical and Ownership)             | SD-WAP / 172284    |
| SD-WAP      | Jul 11, 1989 | SANDIEGOZ / 172284 | SD-WAP / 172284    | Undetermined (Physical and Ownership)             |                    |
| CINCINNAT   | Oct 28, 1992 |                    | CINCINNAT / 192199 | Loan In From (Physical Only)                      |                    |
| SD-WAP      | Oct 28, 1992 |                    | SD-WAP / 172284    | Loan Out To (Initial Transaction - Physical Only) | CINCINNAT / 192199 |

**Ownership History:**

| Reported By | Date         | Source / ID        | Owner / ID         | Term Type                             | Recipient / ID  |
|-------------|--------------|--------------------|--------------------|---------------------------------------|-----------------|
| SANDIEGOZ   | Oct 28, 1972 |                    | SANDIEGOZ / 172284 | Birth/Hatch (Physical and Ownership)  |                 |
| SANDIEGOZ   | Jul 11, 1989 |                    | SANDIEGOZ / 172284 | Undetermined (Physical and Ownership) | SD-WAP / 172284 |
| SD-WAP      | Jul 11, 1989 | SANDIEGOZ / 172284 | SD-WAP / 172284    | Undetermined (Physical and Ownership) |                 |
| CINCINNAT   | Oct 28, 1992 |                    | SD-WAP / 172284    | Reported Owner                        |                 |
| SD-WAP      | Oct 28, 1992 |                    | SD-WAP / 172284    | Reported Owner                        |                 |

| Reported By | Date         | Type                     | Identifier | Location | Comments                                             |
|-------------|--------------|--------------------------|------------|----------|------------------------------------------------------|
| CINCINNAT   | Jul 23, 2002 | Tattoo                   | 51         |          | Legacy SLocation: lft inner thigh<br>Legacy Comment: |
| CINCINNAT   | Oct 28, 1992 | Local ID                 | 192199     |          |                                                      |
| SANDIEGOZ   | Oct 28, 1972 | House Name               | LOUISE     |          |                                                      |
| CINCINNAT   | Oct 28, 1972 | House Name               | LOUISE     |          |                                                      |
| CINCINNAT   | Oct 28, 1972 | Regional Studbook Number | 51         |          | Legacy SLocation: AZA<br>Legacy Comment:             |
| SANDIEGOZ   | Oct 28, 1972 | Tattoo                   | SB51       |          |                                                      |
| SANDIEGOZ   |              | Local ID                 | 172284     |          |                                                      |
| SD-WAP      |              | Local ID                 | 172284     |          |                                                      |

**Sex Information:**

| Reported By | Date         | Sex    | Comments |
|-------------|--------------|--------|----------|
| CINCINNAT   | Oct 28, 1992 | Female |          |
| SANDIEGOZ   | Oct 28, 1972 | Female |          |

**Parent Info:**

| In ZIMS | Parent Info    | Type / Probability | Birth Date   | Reported By |
|---------|----------------|--------------------|--------------|-------------|
| True    | MIG12-27187805 | Dam/100%           | Jan 09, 1956 | CINCINNAT   |
| True    | 9041714        | Sire/100%          | Jan 01, 1958 | CINCINNAT   |

AB06105

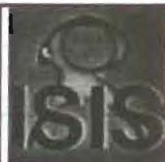

Print [Pedigree Report](#)

# Specimen Report

November 18, 2002 8:53:27 AM

International Species Information System

## Specimen PHILADELP/100007

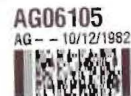

CC SQC

### Names:

| Taxonomic:                   | Common:            | Family:   | Order:   |
|------------------------------|--------------------|-----------|----------|
| <i>Pongo pygmaeus abelii</i> | Sumatran orangutan | Hominidae | Primates |

### Birth Information:

| Sex:   | Birth Location: | Birth date: | Birth type: | Hybrid:      | Rearing: |
|--------|-----------------|-------------|-------------|--------------|----------|
| Female |                 | ~ 1956      | Unknown     | Not a hybrid | Unknown  |

### Visits:

| Date:       | Aquisition:   | Vendor/LocalID:  | Holder:          | Disposition: | Recipient/LocalID: | Date:       |
|-------------|---------------|------------------|------------------|--------------|--------------------|-------------|
| 7 Aug 1962  | Purchase from | ZEEHANDLR/UNK    | PHILADELP/100007 | Sale to      | PITTSBURG/000294   | 10 Mar 1983 |
| 11 Mar 1983 | Purchase from | PHILADELP/100007 | PITTSBURG/294    | Death        |                    | 18 Dec 1986 |

### Identification:

| Date:       | Type:             | Identifier: | Location: | Comments:                                                            |
|-------------|-------------------|-------------|-----------|----------------------------------------------------------------------|
| 7 Aug 1962  | Global Studbook # | 474         | PHILADELP | 474 "International Studbook Number" from ARKS 2 records at PHILADELP |
| 11 Mar 1983 | House Name        | GOOLAH      |           | at PITTSBURG                                                         |
| 28 Oct 1998 | Global Studbook # | 005055      |           | at PITTSBURG                                                         |

### Sex Information:

| Date:       | Sex:   | Comments:    |
|-------------|--------|--------------|
| 7 Aug 1962  | Female | at PHILADELP |
| 11 Mar 1983 | Female | at PITTSBURG |

### Rearing Information:

| Date:       | Rearing: | Comments:    |
|-------------|----------|--------------|
| 7 Aug 1962  | Unknown  | at PHILADELP |
| 11 Mar 1983 | Unknown  | at PITTSBURG |

### Death Information:

| Circumstances: | Carcass Disposition:    | Carcass recipient: | Necropsy:           | Reported By: |
|----------------|-------------------------|--------------------|---------------------|--------------|
| Euthanasia     | Given to an Institution | UNIV PITT          | Urinary, Metabolism | at PITTSBURG |



# Specimen Report

[Print](#) [Pedigree Report](#) May 21, 2003

International Species Information System

[ISIS Home](#)

## Specimen KNOXVILLE/1890

### Names:

|                                                     |                                           |                             |                           |
|-----------------------------------------------------|-------------------------------------------|-----------------------------|---------------------------|
| <b>Taxonomic:</b><br><i>Gorilla gorilla gorilla</i> | <b>Common:</b><br>Western lowland gorilla | <b>Family:</b><br>Hominidae | <b>Order:</b><br>Primates |
|-----------------------------------------------------|-------------------------------------------|-----------------------------|---------------------------|

### Birth Information:

|                     |                                           |                                  |                                    |                                |                           |
|---------------------|-------------------------------------------|----------------------------------|------------------------------------|--------------------------------|---------------------------|
| <b>Sex:</b><br>Male | <b>Birth Location:</b><br><u>OKLAHOMA</u> | <b>Birth date:</b><br>7 Dec 1982 | <b>Birth type:</b><br>Captive born | <b>Hybrid:</b><br>Not a hybrid | <b>Rearing:</b><br>Parent |
|---------------------|-------------------------------------------|----------------------------------|------------------------------------|--------------------------------|---------------------------|

### Visits:

| Date:       | Acquisition:  | Vendor/LocalID:       | Holder:                 | Disposition:  | Recipient/LocalID:      | Date:       |
|-------------|---------------|-----------------------|-------------------------|---------------|-------------------------|-------------|
| 7 Dec 1982  | Birth         |                       | <u>OKLAHOMA/082910</u>  | Sale to       | <u>DENVER/11700</u>     | 21 Jun 1989 |
| 21 Jun 1989 | Purchase from | <u>OKLAHOMA/82910</u> | <u>DENVER/11700</u>     | Loan Out to   | <u>COLO SPRG/94M051</u> | 11 Oct 1994 |
| 11 Oct 1994 | Loan In from  | <u>DENVER/11700</u>   | <u>COLO SPRG/94M051</u> | Loan Transfer | <u>KNOXVILLE/1890</u>   | 25 Oct 1999 |
|             |               |                       | <u>DENVER/11700</u>     | Loan Out to   | <u>KNOXVILLE/1890</u>   | 27 Oct 1999 |
| 27 Oct 1999 | Loan In from  | <u>DENVER/11700</u>   | <u>KNOXVILLE/1890</u>   |               |                         |             |
| 16 Apr 2003 | Donation from | <u>DENVER/11700</u>   | <u>KNOXVILLE/1890</u>   |               |                         |             |

### Identification:

| Date:       | Type:               | Identifier: | Location:        | Comments:                                                            |
|-------------|---------------------|-------------|------------------|----------------------------------------------------------------------|
| 7 Dec 1982  | House Name          | ERNIE       |                  | at DENVER                                                            |
| 7 Dec 1982  | Global Studbook #   | 808/265     |                  | at DENVER                                                            |
| 7 Dec 1982  | Studbook Name       | OKLA 6/G    |                  | at DENVER                                                            |
| 7 Dec 1982  | House Name          | ERNIE       |                  | at OKLAHOMA                                                          |
| 7 Dec 1982  | Studbook Name       | OKLA 6/G    |                  | at OKLAHOMA                                                          |
| 7 Dec 1982  | Global Studbook #   | 808         |                  | at OKLAHOMA                                                          |
| 21 Jun 1989 | House Name          | ERNIE       |                  | at COLO SPRG                                                         |
| 21 Jun 1989 | Regional Studbook # | 808         | UNKNOWN STUDBOOK | 808 "International Studbook Number" from ARKS 2 records at COLO SPRG |
| 27 Oct 1999 | House Name          | Ernie       |                  | at KNOXVILLE                                                         |
| 27 Oct 1999 | Regional Studbook # | 808         | AZA              | at KNOXVILLE                                                         |

### Measurements:

| Date:       | Measurement:       | Value: | Units:   | Comments:            |
|-------------|--------------------|--------|----------|----------------------|
| 10 Mar 1986 | live animal weight | 27.20  | kilogram | WKG 27.20 at DENVER  |
| 10 Mar 1986 | live animal weight | 27.20  | kilogram | at OKLAHOMA          |
| 13 Oct 1987 | live animal weight | 46.70  | kilogram | WKG 46.70 at DENVER  |
| 13 Oct 1987 | live animal weight | 46.70  | kilogram | at OKLAHOMA          |
| 30 Sep 1991 | live animal weight | 264.50 | pound    | WLB 264.50 at DENVER |
| 7 Oct 1991  | live animal weight | 268.50 | pound    | WLB 268.50 at DENVER |
| 21 Oct 1991 | live animal weight | 270.00 | pound    | WLB 270.00 at DENVER |
| 18 Nov 1991 | live animal weight | 269.50 | pound    | WLB 269.50 at DENVER |
| 25 Nov 1991 | live animal weight | 273.50 | pound    | WLB 273.50 at DENVER |
| 30 Dec 1991 | live animal weight | 275.50 | pound    | WLB 275.50 at DENVER |
| 16 Mar 1992 | live animal weight | 296.50 | pound    | WLB 296.50 at DENVER |
| 22 Jun 1992 | live animal weight | 313.50 | pound    | WLB 313.50 at DENVER |
| 6 Jul 1992  | live animal weight | 324.50 | pound    | WLB 324.50 at DENVER |
| 3 Aug 1992  | live animal weight | 340.00 | pound    | WLB 340.00 at DENVER |
| 28 Sep 1992 | live animal weight | 358.00 | pound    | WLB 358.00 at DENVER |
| 5 Oct 1992  | live animal weight | 355.00 | pound    | WLB 355.00 at DENVER |
| 9 Nov 1992  | live animal weight | 363.50 | pound    | WLB 363.50 at DENVER |
| 15 Mar 1993 | live animal weight | 390.00 | pound    | WLB 390.00 at DENVER |
| 22 Mar 1993 | live animal weight | 394.00 | pound    | WLB 394.00 at DENVER |
| 29 Mar 1993 | live animal weight | 393.50 | pound    | WLB 393.50 at DENVER |
| 5 Apr 1993  | live animal weight | 393.00 | pound    | WLB 393.00 at DENVER |
| 12 Apr 1993 | live animal weight | 398.50 | pound    | WLB 398.50 at DENVER |
| 19 Apr 1993 | live animal weight | 399.00 | pound    | WLB 399.00 at DENVER |
| 3 May 1993  | live animal weight | 405.50 | pound    | WLB 405.50 at DENVER |
| 10 May 1993 | live animal weight | 402.00 | pound    | WLB 402.00 at DENVER |
| 17 May 1993 | live animal weight | 406.00 | pound    | WLB 406.00 at DENVER |
| 24 May 1993 | live animal weight | 411.50 | pound    | WLB 411.50 at DENVER |
| 14 Jun 1993 | live animal weight | 409.50 | pound    | WLB 409.50 at DENVER |
| 28 Jun 1993 | live animal weight | 416.50 | pound    | WLB 416.50 at DENVER |
| 5 Jul 1993  | live animal weight | 421.50 | pound    | WLB 421.50 at DENVER |
| 12 Jul 1993 | live animal weight | 421.50 | pound    | WLB 421.50 at DENVER |
| 19 Jul 1993 | live animal weight | 425.00 | pound    | WLB 425.00 at DENVER |
| 26 Jul 1993 | live animal weight | 424.00 | pound    | WLB 424.00 at DENVER |
| 18 Oct 1993 | live animal weight | 441.00 | pound    | WLB 441.00 at DENVER |

|             |                    |        |          |                                           |
|-------------|--------------------|--------|----------|-------------------------------------------|
| 25 Oct 1993 | live animal weight | 440.00 | pound    | WLB 440.00 at DENVER                      |
| 15 Nov 1993 | live animal weight | 433.50 | pound    | WLB 433.50 at DENVER                      |
| 22 Nov 1993 | live animal weight | 434.00 | pound    | WLB 434.00 at DENVER                      |
| 29 Nov 1993 | live animal weight | 432.00 | pound    | WLB 432.00 at DENVER                      |
| 6 Dec 1993  | live animal weight | 435.00 | pound    | WLB 435.00 at DENVER                      |
| 13 Dec 1993 | live animal weight | 437.50 | pound    | WLB 437.50 at DENVER                      |
| 27 Dec 1993 | live animal weight | 443.00 | pound    | WLB 443.00 at DENVER                      |
| 3 Jan 1994  | live animal weight | 445.00 | pound    | WLB 445.00 at DENVER                      |
| 17 Jan 1994 | live animal weight | 442.00 | pound    | WLB 442.00 at DENVER                      |
| 31 Jan 1994 | live animal weight | 442.00 | pound    | WLB 442.00 at DENVER                      |
| 14 Feb 1994 | live animal weight | 441.00 | pound    | WLB 441.00 at DENVER                      |
| 20 Feb 1994 | live animal weight | 438.50 | pound    | WLB 438.50 at DENVER                      |
| 28 Feb 1994 | live animal weight | 438.00 | pound    | WLB 438.00 at DENVER                      |
| 7 Mar 1994  | live animal weight | 442.00 | pound    | WLB 442.00 at DENVER                      |
| 14 Mar 1994 | live animal weight | 444.00 | pound    | WLB 444.00 at DENVER                      |
| 21 Mar 1994 | live animal weight | 446.00 | pound    | WLB 446.00 at DENVER                      |
| 29 Mar 1994 | live animal weight | 440.00 | pound    | WLB 440.00 at DENVER                      |
| 4 Apr 1994  | live animal weight | 438.50 | pound    | WLB 438.50 at DENVER                      |
| 11 Apr 1994 | live animal weight | 436.50 | pound    | WLB 436.50 at DENVER                      |
| 18 Apr 1994 | live animal weight | 437.50 | pound    | WLB 437.50 at DENVER                      |
| 9 May 1994  | live animal weight | 436.00 | pound    | WLB 436.00 at DENVER                      |
| 16 May 1994 | live animal weight | 436.00 | pound    | WLB 436.00 at DENVER                      |
| 23 May 1994 | live animal weight | 429.50 | pound    | WLB 429.50 at DENVER                      |
| 30 May 1994 | live animal weight | 436.00 | pound    | WLB 436.00 at DENVER                      |
| 6 Jun 1994  | live animal weight | 436.00 | pound    | WLB 436.00 at DENVER                      |
| 13 Jun 1994 | live animal weight | 436.00 | pound    | WLB 436.00 at DENVER                      |
| 21 Jun 1994 | live animal weight | 434.00 | pound    | WLB 434.00 at DENVER                      |
| 27 Jun 1994 | live animal weight | 438.00 | pound    | WLB 438.00 at DENVER                      |
| 4 Jul 1994  | live animal weight | 432.00 | pound    | WLB 432.00 at DENVER                      |
| 25 Jul 1994 | live animal weight | 439.00 | pound    | WLB 439.00 at DENVER                      |
| 1 Aug 1994  | live animal weight | 438.00 | pound    | WLB 438.00 at DENVER                      |
| 8 Aug 1994  | live animal weight | 435.50 | pound    | WLB 435.50 at DENVER                      |
| 29 Aug 1994 | live animal weight | 438.00 | pound    | WLB 438.00 at DENVER                      |
| 12 Sep 1994 | live animal weight | 441.00 | pound    | WLB 441.00 at DENVER                      |
| 19 Sep 1994 | live animal weight | 435.50 | pound    | WLB 435.50 at DENVER                      |
| 3 Oct 1994  | live animal weight | 431.00 | pound    | WLB 431.00 at DENVER                      |
| 11 Oct 1994 | live animal weight | 420.00 | pound    | WLB 420.00 at DENVER                      |
| 25 Oct 1999 | live animal weight | 206.40 | kilogram | WKG 206.40 at DENVER                      |
| 25 Oct 1999 | live animal weight | 206.40 | kilogram | Weight from Cheyenne Mt. Zoo at KNOXVILLE |
| 3 Feb 2000  | live animal weight | 448.00 | pound    | WLB 448.00 at DENVER                      |
| 3 Feb 2000  | live animal weight | 448.00 | pound    | at KNOXVILLE                              |

**Special Information:**

| Date:      | Note:                | Comments: |
|------------|----------------------|-----------|
| 7 Dec 1982 | Accession from Group | at DENVER |

**Sex Information:**

| Date:       | Sex: | Comments:    |
|-------------|------|--------------|
| 7 Dec 1982  | Male | at DENVER    |
| 7 Dec 1982  | Male | at OKLAHOMA  |
| 11 Oct 1994 | Male | at COLO SPRG |
| 27 Oct 1999 | Male | at KNOXVILLE |

**Rearing Information:**

| Date:       | Rearing: | Comments:    |
|-------------|----------|--------------|
| 7 Dec 1982  | Parent   | at OKLAHOMA  |
| 11 Oct 1994 | Unknown  | at COLO SPRG |
| 27 Oct 1999 | Parent   | at KNOXVILLE |

**Parents:**

| Date:      | Parent type: | ID:           | Location: | Comments:         |
|------------|--------------|---------------|-----------|-------------------|
| 7 Dec 1982 | Sire         | <u>009701</u> | OKLAHOMA  | while at OKLAHOMA |
| 7 Dec 1982 | Dam          | <u>184403</u> | OKLAHOMA  | while at OKLAHOMA |



Report Start Date  
01-Jan-00

# Specimen Report for OKLAHOMA / 009701

Report End Date  
12-Jul-11

Taxonomic name: *Gorilla gorilla gorilla*

Family: Hominidae

Common name: Western gorilla

Order: Primates

## Current information

Sex: Male Sire ID: WILD at CAMEROON  
Birth type: Wild Born Dam ID: WILD at CAMEROON  
Birth Location: CAMEROON Rearing: Unknown  
Birthdate-Age: ~ Aug 1960 - ~36Y,8M at death Hybrid: Not a hybrid  
Time since last Acq: 34Y,5M,6D as of death

| Date in     | Acquisition - Vendor/local Id  | Holder            | Disposition - Recipient/local Id | Date out   |
|-------------|--------------------------------|-------------------|----------------------------------|------------|
| 28 Nov 1962 | Purchase from ZEEHANDLR / NONE | OKLAHOMA / 009701 | Death                            | 5 May 1997 |

| Date        | Identifier type    | Identifier | Location |
|-------------|--------------------|------------|----------|
| 28 Nov 1962 | House Name         | Moemba     |          |
| 28 Nov 1962 | Studbook Name      | OKLA 11G   |          |
| 28 Nov 1962 | Global Studbook #  | 144        |          |
| 28 Sep 2010 | Local ID Elsewhere | 23903      | STOVALL  |

| Date        | Type               | Value  | Units    |
|-------------|--------------------|--------|----------|
| 16 Nov 1979 | live animal weight | 113.20 | kilogram |
| 21 Jun 1982 | live animal weight | 147.30 | kilogram |
| 15 Feb 1984 | live animal weight | 163.30 | kilogram |
| 19 Mar 1985 | live animal weight | 165.50 | kilogram |
| 21 Nov 1985 | live animal weight | 160.90 | kilogram |
| 5 Feb 1986  | live animal weight | 147.30 | kilogram |
| 20 Oct 1987 | live animal weight | 162.30 | kilogram |
| 19 Dec 1988 | live animal weight | 164.00 | kilogram |
| 5 Oct 1990  | live animal weight | 164.80 | kilogram |
| 17 Dec 1991 | live animal weight | 167.00 | kilogram |
| 15 Jun 1993 | live animal weight | 155.00 | kilogram |
| 19 Jan 1995 | live animal weight | 138.70 | kilogram |
| 11 Jun 1996 | live animal weight | 162.50 | kilogram |
| 19 Mar 1997 | live animal weight | 164.00 | kilogram |
| 8 Apr 1997  | live animal weight | 158.80 | kilogram |
| 5 May 1997  | live animal weight | 148.30 | kilogram |

| Date       | Note type        |                                                       |
|------------|------------------|-------------------------------------------------------|
| 5 May 1997 | Necropsy results | Euthanized - cardiomyopathy<br>Body to Stovall Museum |

| Date        | Enclosure |
|-------------|-----------|
| 28 Nov 1962 | PR        |
| 9 May 1979  | GOR       |
| 15 Jun 1993 | GE        |
| 5 May 1997  | REMOVED   |

| Date        | Sex  |
|-------------|------|
| 28 Nov 1962 | Male |

| Date        | Rearing |
|-------------|---------|
| 28 Nov 1962 | Unknown |

SIRE OF PR00107  
KNOXVILLE (1890)



Report Start Date  
01-Jan-00

Specimen Report for OKLAHOMA / 009701

Report End Date  
12-Jul-11

---

|             |      |      |          |
|-------------|------|------|----------|
| 28 Aug 1960 | Sire | WILD | CAMEROON |
| 28 Aug 1960 | Dam  | WILD | CAMEROON |

---

**Death Information**

According to OKLAHOMA

Circumstances:

Carcass Disposition

Carcass recipient:

Necropsy (Topological):

Necropsy (Etiological):

Euthanasia

Given to an Institution

SAMNOBLE

Cardiovascular

Circulatory, Secondary

Report Start Date  
01-Jan-00

# Specimen Report for OKLAHOMA / 184403

Report End Date  
12-Jul-11

Taxonomic name: *Gorilla gorilla gorilla*

Family: Hominidae

Common name: Western gorilla

Order: Primates

## Current information

|                      |                                   |          |                        |
|----------------------|-----------------------------------|----------|------------------------|
| Sex:                 | Female                            | Sire ID: | WILD at CENTRAL AFRICA |
| Birth type:          | Wild Born                         | Dam ID:  | WILD at CENTRAL AFRICA |
| Birth Location:      | CENTRAL AFRICA                    | Rearing: | Parent                 |
| Birthdate-Age:       | ~ Dec 1962 - 48Y,6M,17D +/- 1 Mo. | Hybrid:  | Not a hybrid           |
| Time since last Acq: | 39Y,7M,8D as of report end date   |          |                        |

| <u>Date in</u> | <u>Acquisition - Vendor/local Id</u> | <u>Holder</u>     | <u>Disposition - Recipient/local Id</u> | <u>Date out</u> |
|----------------|--------------------------------------|-------------------|-----------------------------------------|-----------------|
| 3 Dec 1971     | Purchase from PHILADELP / 10004      | OKLAHOMA / 184403 |                                         |                 |

| <u>Date</u> | <u>Identifier type</u> | <u>Identifier</u> | <u>Location</u> |
|-------------|------------------------|-------------------|-----------------|
| 3 Dec 1971  | House Name             | Kathryn           |                 |
| 3 Dec 1971  | Studbook Name          | PHIL 31G          |                 |
| 3 Dec 1971  | Global Studbook #      | 140               |                 |

| <u>Date</u> | <u>Type</u>        | <u>Value</u> | <u>Units</u> |        |
|-------------|--------------------|--------------|--------------|--------|
| 24 Jun 1964 | live animal weight | 9.1          | kilogram     |        |
| 28 Mar 1972 | live animal weight | 77           | kilogram     |        |
| 22 Feb 1984 | live animal weight | 98           | kilogram     |        |
| 10 Mar 1986 | live animal weight | 86           | kilogram     |        |
| 13 Oct 1987 | live animal weight | 92           | kilogram     |        |
| 2 Oct 1990  | live animal weight | 106          | kilogram     |        |
| 13 Dec 1991 | live animal weight | 108          | kilogram     |        |
| 18 Aug 1992 | live animal weight | 96           | kilogram     |        |
| 2 Mar 1993  | live animal weight | 102          | kilogram     |        |
| 19 May 1993 | live animal weight | 83           | kilogram     |        |
| 15 Jun 1993 | live animal weight | 86           | kilogram     |        |
| 1 Jul 1993  | live animal weight | 84           | kilogram     |        |
| 11 Jun 1996 | live animal weight | 103          | kilogram     |        |
| 30 May 1997 | live animal weight | 99           | kilogram     |        |
| 9 May 1998  | live animal weight | 90           | kilogram     |        |
| 1 Nov 2002  | live animal weight | 94           | kilogram     |        |
| 2 Mar 2005  | live animal weight | 108          | kilogram     | 237 lb |
| 10 Apr 2005 | live animal weight | 106          | kilogram     | 233 lb |
| 17 Jun 2005 | live animal weight | 96           | kilogram     | 212 lb |
| 14 Oct 2005 | live animal weight | 93           | kilogram     | 204 lb |
| 30 Dec 2005 | live animal weight | 97           | kilogram     | 214 lb |
| 4 May 2006  | live animal weight | 98           | kilogram     | 215 lb |
| 28 Jan 2007 | live animal weight | 102          | kilogram     | 224 lb |
| 21 Mar 2007 | live animal weight | 99           | kilogram     | 218 lb |
| 13 Jul 2007 | live animal weight | 101          | kilogram     | 222 lb |
| 17 Sep 2007 | live animal weight | 98           | kilogram     | 216 lb |
| 11 Jan 2008 | live animal weight | 92           | kilogram     | 203 lb |
| 29 May 2008 | live animal weight | 92           | kilogram     | 202 lb |
| 6 Aug 2008  | live animal weight | 94           | kilogram     | 206 lb |
| 11 Oct 2008 | live animal weight | 95           | kilogram     | 210 lb |
| 20 Dec 2008 | live animal weight | 93           | kilogram     | 205 lb |

DAM of PR00107  
KNOXVILLE/1890



Report Start Date  
01-Jan-00

# Specimen Report for OKLAHOMA / 184403

Report End Date  
12-Jul-11

|             |                    |     |          |        |
|-------------|--------------------|-----|----------|--------|
| 9 Jul 2010  | live animal weight | 100 | kilogram |        |
| 18 Oct 2010 | live animal weight | 102 | kilogram |        |
| 26 Jan 2011 | live animal weight | 103 | kilogram | 227 lb |

| <u>Date</u> | <u>Note type</u>   |                                                                                                                         |
|-------------|--------------------|-------------------------------------------------------------------------------------------------------------------------|
| 24 Jun 1964 | Acquisition note   | Philadelphia received from Zeehandelaar and estimated birth as December 1962 - House name at Philadelphia was Catherine |
| 21 Sep 1998 | Physical condition | Left eye removed                                                                                                        |

| <u>Date</u> | <u>Enclosure</u> |
|-------------|------------------|
| 3 Dec 1971  | GOR              |
| 29 Mar 1972 | PR               |
| 15 Dec 1978 | GOR              |
| 2 Mar 1993  | PR               |
| 19 May 1993 | GE               |

| <u>Date</u> | <u>Sex</u>            |                           |
|-------------|-----------------------|---------------------------|
| 3 Dec 1971  | Female                |                           |
| 23 Oct 2005 | Contraception Started | Began birth control pills |

| <u>Date</u> | <u>Rearing</u> |
|-------------|----------------|
| 3 Dec 1971  | Parent         |

| <u>Date</u> | <u>Parent(s)</u> | <u>local Id</u> | <u>Location</u> |
|-------------|------------------|-----------------|-----------------|
| 24 Dec 1962 | Sire             | WILD            | C.AFRICA        |
| 24 Dec 1962 | Dam              | WILD            | C.AFRICA        |

Report Start Date  
1/1/1601

# Specimen Report for YERKES / 728

Report End Date  
1/19/2010

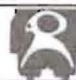

Taxonomic name: *Pan troglodytes*

5004933  
5004934

Family: Hominidae

Common name: Chimpanzee

Order: Primates

## Current information

|                      |                                 |          |                                      |
|----------------------|---------------------------------|----------|--------------------------------------|
| Sex:                 | Female                          | Sire ID: | UNK at Yerkes NPRC, Emory University |
| Birth type:          | Captive Born                    | Dam ID:  | 500 at Yerkes NPRC, Emory University |
| Birth Location:      | Yerkes NPRC, Emory University   | Rearing: | Parent                               |
| Birthdate-Age:       | 17 May 1995 - 14Y,8M,4D         | Hybrid:  | Not a hybrid                         |
| Time since last Acq: | 14Y,8M,4D as of report end date |          |                                      |

| <u>Date in</u> | <u>Acquisition - Vendor/local Id</u> | <u>Holder</u> | <u>Disposition - Recipient/local Id</u> | <u>Date out</u> |
|----------------|--------------------------------------|---------------|-----------------------------------------|-----------------|
| 17 May 1995    | Birth                                | YERKES / 728  |                                         |                 |

| <u>Date</u> | <u>Identifier type</u> | <u>Identifier</u>                | <u>Location</u> | <u>Comments</u> |
|-------------|------------------------|----------------------------------|-----------------|-----------------|
| 17 May 1995 | Global Studbook #      | 6286                             |                 |                 |
| 18 May 1995 | House Name             | JAIMIE                           |                 |                 |
| 18 May 1995 | Sire Taxon             | Sire amos (495) or phineas (61a) |                 |                 |

| <u>Date</u> | <u>Note type</u>    | <u>Comments</u>                            |
|-------------|---------------------|--------------------------------------------|
| 17 May 1995 | National Chimp Plan | ON NCP Breeding Program<br>N/A<br>[[MSS]]  |
| 29 Sep 1995 | National Chimp Plan | OFF NCP Breeding Program<br>N/A<br>[[MSS]] |

| <u>Date</u> | <u>Sex</u> | <u>Comments</u> |
|-------------|------------|-----------------|
| 17 May 1995 | Female     |                 |

| <u>Date</u> | <u>Rearing</u> | <u>Comments</u> |
|-------------|----------------|-----------------|
| 17 May 1995 | Parent         |                 |

| <u>Date</u> | <u>Parent(s)</u> | <u>local Id</u> | <u>Location</u> | <u>Comments</u> |
|-------------|------------------|-----------------|-----------------|-----------------|
| 17 May 1995 | Sire             | UNK             | YERKES          |                 |
| 17 May 1995 | Dam              | 500             | YERKES          |                 |

CORRELL  
SAMPLE



Report Start Date  
1/1/1601

# Specimen Report for YERKES / 495

Report End Date  
1/19/2010

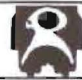

Taxonomic name: *Pan troglodytes*  
Common name: Chimpanzee

5004960

Family: Hominidae  
Order: Primates

## Current information

|                      |                                 |          |                                      |
|----------------------|---------------------------------|----------|--------------------------------------|
| Sex:                 | Male                            | Sire ID: | 61A at Yerkes NPRC, Emory University |
| Birth type:          | Captive Born                    | Dam ID:  | 406 at Yerkes NPRC, Emory University |
| Birth Location:      | Yerkes NPRC, Emory University   | Rearing: | Unknown                              |
| Birthdate-Age:       | 11 Nov 1981 - 28Y,2M,8D         | Hybrid:  | Not a hybrid                         |
| Time since last Acq: | 28Y,2M,8D as of report end date |          |                                      |

| <u>Date in</u> | <u>Acquisition - Vendor/local Id</u> | <u>Holder</u> | <u>Disposition - Recipient/local Id</u> | <u>Date out</u> |
|----------------|--------------------------------------|---------------|-----------------------------------------|-----------------|
| 11 Nov 1981    | Birth                                | YERKES / 495  |                                         |                 |

| <u>Date</u> | <u>Identifier type</u> | <u>Identifier</u> | <u>Location</u> | <u>Comments</u> |
|-------------|------------------------|-------------------|-----------------|-----------------|
| 17 Nov 1981 | House Name             | AMOS              |                 |                 |
| 17 Nov 1981 | Global Studbook #      | 4452              |                 |                 |

| <u>Date</u> | <u>Note type</u>    | <u>Comments</u>                           |
|-------------|---------------------|-------------------------------------------|
| 30 Sep 1986 | National Chimp Plan | ON NCP Breeding Program<br>N/A<br>[[MSS]] |

| <u>Date</u> | <u>Sex</u> | <u>Comments</u> |
|-------------|------------|-----------------|
| 11 Nov 1981 | Male       |                 |

| <u>Date</u> | <u>Rearing</u> | <u>Comments</u> |
|-------------|----------------|-----------------|
| 11 Nov 1981 | Unknown        |                 |

| <u>Date</u> | <u>Parent(s)</u> | <u>local Id</u> | <u>Location</u> | <u>Comments</u> |
|-------------|------------------|-----------------|-----------------|-----------------|
| 11 Nov 1981 | Sire             | 61A             | YERKES          |                 |
| 11 Nov 1981 | Dam              | 406             | YERKES          |                 |

POSSIBLE  
FATHER

Report Start Date  
1/1/1601

# Specimen Report for YERKES / 61A

Report End Date  
1/19/2010

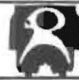

Taxonomic name: *Pan troglodytes*  
Common name: Chimpanzee

5004978  
5004979

Family: Hominidae  
Order: Primates

## Current information

Sex: Male Sire ID:  
Birth type: Unknown Dam ID:  
Birth Location: Unknown Location Rearing: Unknown  
Birthdate-Age: ~ 1966 - ~44Y Hybrid: Not a hybrid  
Time since last Acq: 36Y,3M,27D as of report end date

| Date in     | Acquisition - Vendor/local Id | Holder       | Disposition - Recipient/local Id | Date out |
|-------------|-------------------------------|--------------|----------------------------------|----------|
| 22 Sep 1973 | Donation from HAWTHORNE / UNK | YERKES / 61A |                                  |          |

| Date        | Identifier type   | Identifier | Location | Comments |
|-------------|-------------------|------------|----------|----------|
| 22 Sep 1973 | House Name        | PHINEAS    |          |          |
| 22 Sep 1973 | Global Studbook # | 1606       |          |          |

| Date        | Note type           | Comments                                  |
|-------------|---------------------|-------------------------------------------|
| 30 Sep 1986 | National Chimp Plan | ON NCP Breeding Program<br>N/A<br>[[MSS]] |

| Date        | Sex  | Comments |
|-------------|------|----------|
| 22 Sep 1973 | Male |          |

| Date        | Rearing | Comments |
|-------------|---------|----------|
| 22 Sep 1973 | Unknown |          |

POSSIBLE  
PATERAL  
GRANDFATHER

Report Start Date  
1/1/1601

# Specimen Report for YERKES / 406

Report End Date  
6/11/2010

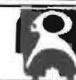

Taxonomic name: *Pan troglodytes*  
Common name: Chimpanzee

Family: Hominidae  
Order: Primates

## Current Information

Sex: Female Sire ID:  
Birth type: Unknown Dam ID:  
Birth Location: Rearing: Unknown  
Birthdate-Age: ~ 1959 - ~41Y at death Hybrid: Not a hybrid  
Time since last Acq: 31Y,5M,22D as of death

| Date in     | Acquisition - Vendor/local Id | Holder       | Disposition - Recipient/local Id | Date out   |
|-------------|-------------------------------|--------------|----------------------------------|------------|
| 13 Nov 1969 | Trade from HOLLOMAN / 122     | YERKES / 406 | Death                            | 6 May 2001 |

| Date        | Identifier type   | Identifier | Location | Comments |
|-------------|-------------------|------------|----------|----------|
| 13 Nov 1969 | House Name        | SONIA      |          |          |
| 13 Nov 1969 | Global Studbook # | 1040       |          |          |

| Date        | Note type           | Comments                                   |
|-------------|---------------------|--------------------------------------------|
| 12 Feb 1990 | National Chimp Plan | ON NCP Breeding Program                    |
| 29 Sep 1995 | National Chimp Plan | OFF NCP Breeding Program<br>N/A<br>[[MSS]] |

| Date        | Sex    | Comments |
|-------------|--------|----------|
| 13 Nov 1969 | Female |          |

| Date        | Rearing | Comments |
|-------------|---------|----------|
| 13 Nov 1969 | Unknown |          |

POSSIBLE  
PATERNAL  
GRANDMOTHER



Report Start Date  
1/1/1601

# Specimen Report for YERKES / 61A

Report End Date  
1/19/2010

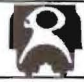

Taxonomic name: *Pan troglodytes*  
Common name: Chimpanzee

5004978  
5004979

Family: Hominidae  
Order: Primates

## Current information

Sex: Male Sire ID:  
Birth type: Unknown Dam ID:  
Birth Location: Unknown Location Rearing: Unknown  
Birthdate-Age: ~ 1966 - ~44Y Hybrid: Not a hybrid  
Time since last Acq: 36Y,3M,27D as of report end date

| Date in     | Acquisition - Vendor/local Id | Holder       | Disposition - Recipient/local Id | Date out |
|-------------|-------------------------------|--------------|----------------------------------|----------|
| 22 Sep 1973 | Donation from HAWTHORNE / UNK | YERKES / 61A |                                  |          |

| Date        | Identifier type   | Identifier | Location | Comments |
|-------------|-------------------|------------|----------|----------|
| 22 Sep 1973 | House Name        | PHINEAS    |          |          |
| 22 Sep 1973 | Global Studbook # | 1606       |          |          |

| Date        | Note type           | Comments                                  |
|-------------|---------------------|-------------------------------------------|
| 30 Sep 1986 | National Chimp Plan | ON NCP Breeding Program<br>N/A<br>[[MSS]] |

| Date        | Sex  | Comments |
|-------------|------|----------|
| 22 Sep 1973 | Male |          |

| Date        | Rearing | Comments |
|-------------|---------|----------|
| 22 Sep 1973 | Unknown |          |

POSSIBLE  
FATHER

Report Start Date  
1/1/1601

# Specimen Report for YERKES / 500

Report End Date  
1/19/2010

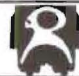

Taxonomic name: *Pan troglodytes*  
Common name: Chimpanzee

5005051

Family: Hominidae  
Order: Primates

## Current Information

Sex: Female Sire ID:  
Birth type: Wild Born Dam ID:  
Birth Location: Rearing: Unknown  
Birthdate-Age: ~ Oct 1973 - ~36Y,2M Hybrid: Not a hybrid  
Time since last Acq: 35Y,5M,0D as of report end date

| <u>Date in</u> | <u>Acquisition - Vendor/local id</u> | <u>Holder</u> | <u>Disposition - Recipient/local id</u> | <u>Date out</u> |
|----------------|--------------------------------------|---------------|-----------------------------------------|-----------------|
| 20 Aug 1974    | Donation from LUCAS E / SUE          | YERKES / 500  |                                         |                 |

| <u>Date</u> | <u>Identifier type</u> | <u>Identifier</u> | <u>Location</u> | <u>Comments</u> |
|-------------|------------------------|-------------------|-----------------|-----------------|
| 20 Aug 1974 | House Name             | ERICKA            |                 |                 |
| 20 Aug 1974 | Global Studbook #      | 3140              |                 |                 |

| <u>Date</u> | <u>Note type</u>    | <u>Comments</u>                           |
|-------------|---------------------|-------------------------------------------|
| 30 Sep 1986 | National Chimp Plan | ON NCP Breeding Program<br>N/A<br>[[MSS]] |

| <u>Date</u> | <u>Sex</u> | <u>Comments</u> |
|-------------|------------|-----------------|
| 20 Aug 1974 | Female     |                 |

| <u>Date</u> | <u>Rearing</u> | <u>Comments</u> |
|-------------|----------------|-----------------|
| 20 Aug 1974 | Unknown        |                 |

MOTHER

Report Start Date  
1/1/1601

# Specimen Report for YERKES / 597

Report End Date  
7/23/2010

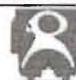

Taxonomic name: *Pan troglodytes*

5003648

Family: Hominidae

Common name: Chimpanzee

5003649

Order: Primates

## Current information

|                      |                                   |          |                                      |
|----------------------|-----------------------------------|----------|--------------------------------------|
| Sex:                 | Male                              | Sire ID: | 389 at Yerkes NPRC, Emory University |
| Birth type:          | Captive Born                      | Dam ID:  | 46A at Yerkes NPRC, Emory University |
| Birth Location:      | Yerkes NPRC, Emory University     | Rearing: | Hand                                 |
| Birthdate-Age:       | 27 Aug 1990 - 19Y,10M,26D         | Hybrid:  | Not a hybrid                         |
| Time since last Acq: | 19Y,10M,26D as of report end date |          |                                      |

| <u>Date in</u> | <u>Acquisition - Vendor/local Id</u> | <u>Holder</u> | <u>Disposition - Recipient/local Id</u> | <u>Date out</u> |
|----------------|--------------------------------------|---------------|-----------------------------------------|-----------------|
| 27 Aug 1990    | Birth                                | YERKES / 597  |                                         |                 |

| <u>Date</u> | <u>Identifier type</u> | <u>Identifier</u> | <u>Location</u> | <u>Comments</u> |
|-------------|------------------------|-------------------|-----------------|-----------------|
| 27 Aug 1990 | House Name             | JOSH              |                 |                 |
| 27 Aug 1990 | Global Studbook #      | 5678              |                 |                 |

| <u>Date</u> | <u>Note type</u>    | <u>Comments</u>                            |
|-------------|---------------------|--------------------------------------------|
| 27 Aug 1990 | National Chimp Plan | ON NCP Breeding Program                    |
| 30 Mar 1996 | National Chimp Plan | OFF NCP Breeding Program<br>N/A<br>[[MSS]] |

| <u>Date</u> | <u>Sex</u> | <u>Comments</u> |
|-------------|------------|-----------------|
| 27 Aug 1990 | Male       |                 |

| <u>Date</u> | <u>Rearing</u> | <u>Comments</u> |
|-------------|----------------|-----------------|
| 27 Aug 1990 | Hand           |                 |

| <u>Date</u> | <u>Parent(s)</u> | <u>local Id</u> | <u>Location</u> | <u>Comments</u> |
|-------------|------------------|-----------------|-----------------|-----------------|
| 27 Aug 1990 | Sire             | 389             | YERKES          |                 |
| 27 Aug 1990 | Dam              | 46A             | YERKES          |                 |

CORRELL  
SAMPLE



Report Start Date  
1/1/2001

# Specimen Report for YERKES / 389

Report End Date  
1/19/2010

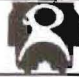

Taxonomic name: *Pan troglodytes*  
Common name: Chimpanzee

5004968

Family: Hominidae  
Order: Primates

## Current information

Sex: Male Sire ID:  
Birth type: Unknown Dam ID:  
Birth Location: Rearing: Unknown  
Birthdate-Age: ~ 1969 - ~41Y Hybrid: Not a hybrid  
Time since last Acq: 35Y, 10M, 14D as of report end date

| Date in    | Acquisition - Vendor/local Id | Holder       | Disposition - Recipient/local Id | Date out |
|------------|-------------------------------|--------------|----------------------------------|----------|
| 7 Mar 1974 | Donation from DURHAM / UNK    | YERKES / 389 |                                  |          |

| Date       | Identifier type   | Identifier | Location | Comments |
|------------|-------------------|------------|----------|----------|
| 7 Mar 1974 | House Name        | ROGGER     |          |          |
| 7 Mar 1974 | Global Studbook # | 2363       |          |          |

| Date        | Note type           | Comments                                  |
|-------------|---------------------|-------------------------------------------|
| 30 Sep 1995 | National Chimp Plan | ON NCP Breeding Program<br>N/A<br>[[MSS]] |

| Date       | Sex  | Comments |
|------------|------|----------|
| 7 Mar 1974 | Male |          |

| Date       | Rearing | Comments |
|------------|---------|----------|
| 7 Mar 1974 | Unknown |          |

FATHER

Report Start Date  
1/1/1601

# Specimen Report for YERKES / 46A

Report End Date  
1/19/2010

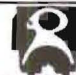

Taxonomic name: *Pan troglodytes*

Family: Hominidae

Common name: Chimpanzee

Order: Primates

5003639

## Current information

Sex: Female Sire ID:  
Birth type: Unknown Dam ID:  
Birth Location: Rearing: Unknown  
Birthdate-Age: ~ 1967 - ~43Y Hybrid: Not a hybrid  
Time since last Acq: 36Y,3M,27D as of report end date

| Date in     | Acquisition - Vendor/local Id | Holder       | Disposition - Recipient/local Id | Date out |
|-------------|-------------------------------|--------------|----------------------------------|----------|
| 22 Sep 1973 | Purchase from LEMSIP / 46     | YERKES / 46A |                                  |          |

| Date        | Identifier type   | Identifier | Location | Comments |
|-------------|-------------------|------------|----------|----------|
| 22 Sep 1973 | House Name        | GAY        |          |          |
| 22 Sep 1973 | Global Studbook # | 2208       |          |          |

| Date        | Note type           | Comments                |
|-------------|---------------------|-------------------------|
| 12 Feb 1990 | National Chimp Plan | ON NCP Breeding Program |

| Date        | Sex    | Comments |
|-------------|--------|----------|
| 22 Sep 1973 | Female |          |

| Date        | Rearing | Comments |
|-------------|---------|----------|
| 22 Sep 1973 | Unknown |          |

MOTHER

Report Start Date  
1/1/1601

# Specimen Report for YERKES / 643

Report End Date  
1/19/2010

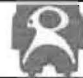

Taxonomic name: *Pan troglodytes*  
Common name: Chimpanzee

5003611

Family: Hominidae  
Order: Primates

## Current information

Sex: Male Sire ID: 381 at Yerkes NPRC, Emory University  
Birth type: Captive Born Dam ID: 434 at Yerkes NPRC, Emory University  
Birth Location: Yerkes NPRC, Emory University Rearing: Parent  
Birthdate-Age: 26 Sep 1993 - 16Y,3M,23D Hybrid: Not a hybrid  
Time since last Acq: 16Y,3M,23D as of report end date

| Date in     | Acquisition - Vendor/local Id | Holder       | Disposition - Recipient/local Id | Date out |
|-------------|-------------------------------|--------------|----------------------------------|----------|
| 26 Sep 1993 | Birth                         | YERKES / 643 |                                  |          |

| Date        | Identifier type   | Identifier | Location | Comments |
|-------------|-------------------|------------|----------|----------|
| 26 Sep 1993 | House Name        | MAVERICK   |          |          |
| 26 Sep 1993 | Global Studbook # | 6272       |          |          |

| Date        | Note type           | Comments                                   |
|-------------|---------------------|--------------------------------------------|
| 26 Sep 1993 | National Chimp Plan | ON NCP Breeding Program                    |
| 29 Sep 1995 | National Chimp Plan | OFF NCP Breeding Program<br>N/A<br>[[MSS]] |

| Date        | Sex  | Comments |
|-------------|------|----------|
| 26 Sep 1993 | Male |          |

| Date        | Rearing | Comments |
|-------------|---------|----------|
| 26 Sep 1993 | Parent  |          |

| Date        | Parent(s) | local Id | Location | Comments |
|-------------|-----------|----------|----------|----------|
| 26 Sep 1993 | Sire      | 381      | YERKES   |          |
| 26 Sep 1993 | Dam       | 434      | YERKES   |          |

CORRELL  
SAMPLE



Report Start Date  
1/1/1601

# Specimen Report for YERKES / 381

Report End Date  
1/19/2010

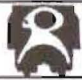

Taxonomic name: *Pan troglodytes*

Common name: Chimpanzee

5003657

Family: Hominidae

Order: Primates

## Current information

Sex: Male Sire ID:  
Birth type: Unknown Dam ID:  
Birth Location: Rearing: Unknown  
Birthdate-Age: ~ 1964 - ~46Y Hybrid: Not a hybrid  
Time since last Acq: 37Y,3M,23D as of report end date

| Date in     | Acquisition - Vendor/local Id | Holder       | Disposition - Recipient/local Id | Date out |
|-------------|-------------------------------|--------------|----------------------------------|----------|
| 26 Sep 1972 | Donation from DURHAM / UNK    | YERKES / 381 |                                  |          |

| Date        | Identifier type   | Identifier | Location | Comments |
|-------------|-------------------|------------|----------|----------|
| 26 Sep 1972 | House Name        | JIMOH      |          |          |
| 26 Sep 1972 | Global Studbook # | 1629       |          |          |

| Date        | Note type           | Comments                                   |
|-------------|---------------------|--------------------------------------------|
| 30 Sep 1986 | National Chimp Plan | ON NCP Breeding Program<br>N/A<br>[[MSS]]  |
| 29 Sep 1995 | National Chimp Plan | OFF NCP Breeding Program<br>N/A<br>[[MSS]] |

| Date        | Sex  | Comments |
|-------------|------|----------|
| 26 Sep 1972 | Male |          |

| Date        | Rearing | Comments |
|-------------|---------|----------|
| 26 Sep 1972 | Unknown |          |

FATHER

Report Start Date  
1/1/1971

# Specimen Report for YERKES / 434

Report End Date  
1/19/2010

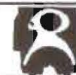

Taxonomic name: *Pan troglodytes*  
Common name: Chimpanzee

5003612

Family: Hominidae  
Order: Primates

## Current Information

Sex: Female Sire ID: UNK at Yerkes NPRC, Emory University  
Birth type: Captive Born Dam ID: 268 at Yerkes NPRC, Emory University  
Birth Location: Yerkes NPRC, Emory University Rearing: Unknown  
Birthdate-Age: 13 Jan 1971 - 29Y,9M,9D at death Hybrid: Not a hybrid  
Time since last Acq: 29Y,9M,9D as of death

| Date in     | Acquisition - Vendor/local Id | Holder       | Disposition - Recipient/local Id | Date out    |
|-------------|-------------------------------|--------------|----------------------------------|-------------|
| 13 Jan 1971 | Birth                         | YERKES / 434 | Death / NHXX                     | 23 Oct 2000 |

| Date        | Identifier type   | Identifier | Location | Comments |
|-------------|-------------------|------------|----------|----------|
| 13 Jan 1971 | House Name        | MARILYNE   |          |          |
| 13 Jan 1971 | Global Studbook # | 2831       |          |          |

| Date        | Note type           | Comments                                  |
|-------------|---------------------|-------------------------------------------|
| 30 Sep 1986 | National Chimp Plan | ON NCP Breeding Program<br>N/A<br>[[MSS]] |

| Date        | Sex    | Comments |
|-------------|--------|----------|
| 13 Jan 1971 | Female |          |

| Date        | Rearing | Comments |
|-------------|---------|----------|
| 13 Jan 1971 | Unknown |          |

| Date        | Parent(s) | local Id | Location | Comments |
|-------------|-----------|----------|----------|----------|
| 13 Jan 1971 | Sire      | UNK      | YERKES   |          |
| 13 Jan 1971 | Dam       | 268      | YERKES   |          |

## Death Information

According to YERKES  
Circumstances: Other/Unknown  
Carcass Disposition: Unknown  
Carcass recipient:  
Necropsy (Topological): Unknown  
Necropsy (Etiological): Unknown

MOTHER

**Specimen BROWNSVIL/71**

**Names:**

| Taxonomic:            | Common:            | Family:   | Order:   |
|-----------------------|--------------------|-----------|----------|
| <i>Pongo pygmaeus</i> | Sumatran orangutan | Hominidae | Primates |

**Birth Information:**

| Sex:   | Birth Location: | Birth date: | Birth type: | Hybrid:      | Rearing: |
|--------|-----------------|-------------|-------------|--------------|----------|
| Female | JAJASAN         | ~ 1964      | Wild Born   | Not a hybrid | Unknown  |

**Visits:**

| Date:       | Acquisition:  | Vendor/LocalID: | Reported by: | Disposition:         | Recipient/LocalID: | Date:       |
|-------------|---------------|-----------------|--------------|----------------------|--------------------|-------------|
| 13 Oct 1969 | Loan In from  | BROWNSVIL/71    | OMAHA/738    | Loan Return to Owner | BROWNSVIL/71       | 17 Jul 1970 |
| 19 Jul 1970 | Purchase from | THOU OAKS/UNK   | BROWNSVIL/71 |                      |                    |             |

**Identification:**

| Date:       | Type:               | Identifier:                        | Location:        | Comments:                                                                             |
|-------------|---------------------|------------------------------------|------------------|---------------------------------------------------------------------------------------|
| 12 Oct 1964 | Regional Studbook # | 1044                               | UNKNOWN STUDBOOK | 1044 UNKNOWN STUDBOOK<br>"International Studbook Number" from ARKS 2 records at OMAHA |
| 13 Oct 1969 | House Name          | SUSIE                              |                  | at OMAHA                                                                              |
| 19 Jul 1970 | Global Studbook #   | 1044                               |                  | at BROWNSVIL                                                                          |
| 19 Jul 1970 | House Name          | SUSIE                              |                  | at BROWNSVIL                                                                          |
| 20 May 1986 | Global Studbook #   | 1044                               |                  | at BROWNSVIL                                                                          |
| 20 May 1993 | Transponder ID      | 00-00F7-1D63                       | Craniomedial to  | at BROWNSVIL                                                                          |
| 30 Aug 1995 | Tag/Band            | PIT 00004EBBF1 CAUDOMEDIAL TO R SC | CAUDOMEDIAL TO R | at BROWNSVIL                                                                          |
| 28 Jan 1999 | Tattoo              | PIT 0001FD9766 IN MGA IMPLANT      | IN MGA IMPLANT   | at BROWNSVIL                                                                          |
| 15 Jan 2004 | Transponder ID      | 00-01EE-5B42                       | In MGA implant   | at BROWNSVIL                                                                          |

**Sex Information:**

| Date:       | Sex:   | Comments:    |
|-------------|--------|--------------|
| 13 Oct 1969 | Female | at OMAHA     |
| 19 Jul 1970 | Female | at BROWNSVIL |

**Rearing Information:**

| Date:       | Rearing: | Comments: |
|-------------|----------|-----------|
| 13 Oct 1969 | Unknown  | at OMAHA  |

**Parents:**

| Date: | Parent type: | ID:     | Location: | Comments: |
|-------|--------------|---------|-----------|-----------|
| -     | Sire         | Unknown | Wild      | -         |
| -     | Dam          | Unknown | Wild      | -         |



**Specimen Report**

Print Pedigree Report March 13, 2003

**International Species Information System**

ISIS Home

**Specimen SANDIEGOZ/027944**

PR00572

PR - 03/14/2003

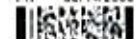

BU 50C

**Names:**

| Taxonomic:                     | Common:                 | Family:   | Order:   |
|--------------------------------|-------------------------|-----------|----------|
| <i>Gorilla gorilla gorilla</i> | Western lowland gorilla | Hominidae | Primates |

**Birth Information:**

| Sex: | Birth Location: | Birth date: | Birth type: | Hybrid: | Rearing: |
|------|-----------------|-------------|-------------|---------|----------|
| Male | AFRICAN         | - Jan 1969  | Wild Born   |         | Unknown  |

**Visits:**

| Date:       | Acquisition:        | Vendor/LocalID:  | Holder:          | Disposition:         | Recipient/LocalID: | Date:       |
|-------------|---------------------|------------------|------------------|----------------------|--------------------|-------------|
| 28 Mar 1984 | Donation from       | WEYBRIDGE        | SANDIEGOZ/027944 | Loan Out to          | PHILADELP/101834   | 29 Jun 1989 |
| 30 Jun 1989 | Loan In from        | SANDIEGOZ/027944 | PHILADELP/101834 | Loan Return to Owner | SANDIEGOZ/024680   | 16 Feb 1991 |
| 16 Feb 1991 | Loan Returned to Us | PHILADELP/101834 | SANDIEGOZ/027944 |                      |                    |             |

**Identification:**

| Date:       | Type:               | Identifier: | Location: | Comments:    |
|-------------|---------------------|-------------|-----------|--------------|
| 5 Jul 1969  | House Name          | MEMBA       |           | at PHILADELP |
| 5 Jul 1969  | Regional Studbook # | 442         | AZA       | at PHILADELP |
| 5 Jul 1969  | Studbook Name       | WEY 4/G     |           | at PHILADELP |
| 5 Jul 1969  | Global Studbook #   | 442         |           | at PHILADELP |
| 16 Feb 1991 | House Name          | MEMBA       |           | at SANDIEGOZ |

PR00573

PR - 03/14/2003

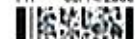

CC 50C

**Sex Information:**

| Date:       | Sex: | Comments:    |
|-------------|------|--------------|
| 1 Jan 1969  | Male | at SANDIEGOZ |
| 30 Jun 1989 | Male | at PHILADELP |

**Rearing Information:**

| Date:       | Rearing: | Comments:    |
|-------------|----------|--------------|
| 30 Jun 1989 | Unknown  | at PHILADELP |

**Parents:**

| Date: | Parent type: | ID:     | Location: | Comments: |
|-------|--------------|---------|-----------|-----------|
| -     | Sire         | Unknown | Wild      | -         |
| -     | Dam          | Unknown | Wild      | -         |

# Specimen Report

[Print](#) [Pedigree Report](#) May 28, 2003

## International Species Information System

[ISIS Home](#)

Specimen SANDIEGOZ/174013

### Names:

| Taxonomic:          | Common:          | Family:   | Order:   |
|---------------------|------------------|-----------|----------|
| <i>Pan paniscus</i> | Pygmy chimpanzee | Hominidae | Primates |

### Birth Information:

| Sex:   | Birth Location: | Birth date: | Birth type:  | Hybrid: | Rearing: |
|--------|-----------------|-------------|--------------|---------|----------|
| Female | SANDIEGOZ       | 22 Jan 1974 | Captive born |         |          |

### Visits:

| Date:       | Acquisition:          | Vendor/LocalID:  | Holder:           | Disposition:          | Recipient/LocalID: | Date:       |
|-------------|-----------------------|------------------|-------------------|-----------------------|--------------------|-------------|
| 22 Jan 1974 | Birth                 |                  | SANDIEGOZ/174013  | Term Free Disposition | SD-<br>WAP/174013  | 10 Jul 1989 |
| 10 Jul 1989 | Term Free Acquisition | SANDIEGOZ/174013 | SD-<br>WAP/174013 |                       |                    |             |

### Identification:

| Date:       | Type:          | Identifier: | Location: | Comments:    |
|-------------|----------------|-------------|-----------|--------------|
| 22 Jan 1974 | House Name     | LORETTA     |           | at SANDIEGOZ |
| 22 Jan 1974 | Tattoo         | SB59        |           | at SANDIEGOZ |
| 26 Oct 1998 | Transponder ID | 000132ABB7  |           | at SD-WAP    |

### Sex Information:

| Date:       | Sex:   | Comments:    |
|-------------|--------|--------------|
| 22 Jan 1974 | Female | at SD-WAP    |
| 22 Jan 1974 | Female | at SANDIEGOZ |

### Parents:

| Date:       | Parent type: | ID:           | Location: | Comments:          |
|-------------|--------------|---------------|-----------|--------------------|
| 22 Jan 1974 | Sire         | <u>160134</u> | SANDIEGOZ | while at SANDIEGOZ |
| 22 Jan 1974 | Dam          | <u>162184</u> | SANDIEGOZ | while at SANDIEGOZ |

**Specimen Report** [Print](#) [Pedigree Report](#) June 6, 2003  
**International Species Information System** [ISIS Home](#)

**Specimen SD-WAP/165151**

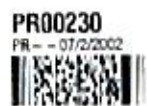

CC

**Names:**  
**Taxonomic:** *Gorilla gorilla gorilla*  
**Common:** Western lowland gorilla  
**Family:** Hominidae  
**Order:** Primates

**Birth Information:**  
**Sex:** Female  
**Birth Location:** SANDIEGOZ  
**Birth date:** 3 Jun 1965  
**Birth type:** Captive born  
**Hybrid:**  
**Rearing:** Unknown

**Visits:**

| Date:       | Acquisition:          | Vendor/LocalID:   | Holder:           | Disposition:          | Recipient/LocalID: | Date:       |
|-------------|-----------------------|-------------------|-------------------|-----------------------|--------------------|-------------|
| 16 Apr 1972 | Term Free Acquisition | SANDIEGOZ/165151  | SD-<br>WAP/165151 | Loan Out to           | FRESNO/1082        | 1 Mar 1978  |
| 1 Mar 1978  | Loan In from          | SD-<br>WAP/165151 | FRESNO/1082       | Loan Return to Owner  | SD-<br>WAP/100087  | 12 Jul 1981 |
|             |                       |                   | SD-<br>WAP/165151 | Term Free Disposition | SANDIEGOZ/165151   | 11 Jul 1981 |

**Identification:**

| Date:      | Type:               | Identifier: | Location: | Comments: |
|------------|---------------------|-------------|-----------|-----------|
| 1 Mar 1978 | House Name          | ALVILA      |           | at FRESNO |
| 1 Mar 1978 | Regional Studbook # | 223/7       | AZA       | at FRESNO |

**Sex Information:**

| Date:      | Sex:   | Comments: |
|------------|--------|-----------|
| 3 Jun 1965 | Female | at SD-WAP |
| 1 Mar 1978 | Female | at FRESNO |

**Rearing Information:**

| Date:      | Rearing: | Comments: |
|------------|----------|-----------|
| 1 Mar 1978 | Unknown  | at FRESNO |



| <b>Specimen Report</b>                          |                                      | Print                            | <a href="#">Pedigree Report</a> | May 21, 2003        | <a href="#">ISIS Home</a> |              |
|-------------------------------------------------|--------------------------------------|----------------------------------|---------------------------------|---------------------|---------------------------|--------------|
| <b>International Species Information System</b> |                                      |                                  |                                 |                     |                           |              |
| <b>Specimen JACKSONVL/898051</b>                |                                      |                                  |                                 |                     |                           |              |
| <b>Names:</b>                                   |                                      |                                  |                                 |                     |                           |              |
| <b>Taxonomic:</b><br><i>Pan paniscus</i>        | <b>Common:</b><br>Pygmy chimpanzee   | <b>Family:</b><br>Hominidae      | <b>Order:</b><br>Primates       |                     |                           |              |
| <b>Birth Information:</b>                       |                                      |                                  |                                 |                     |                           |              |
| <b>Sex:</b><br>Male                             | <b>Birth Location:</b><br>KINSHA, CT | <b>Birth date:</b><br>1 Jan 1971 | <b>Birth type:</b><br>Wild Born | <b>Hybrid:</b>      | <b>Rearing:</b><br>Parent |              |
| <b>Visits:</b>                                  |                                      |                                  |                                 |                     |                           |              |
| <b>Date:</b>                                    | <b>Acquisition:</b>                  | <b>Vendor/LocalID:</b>           | <b>Holder:</b>                  | <b>Disposition:</b> | <b>Recipient/LocalID:</b> | <b>Date:</b> |
| 27 Mar 1975                                     | Donation from                        | KINSHASA/UNK                     | YERKES/P4                       | Loan Out to         | JACKSONVL                 | 15 Apr 1998  |
| 15 Apr 1998                                     | Loan In from                         | YERKES/P4                        | JACKSONVL/898051                |                     |                           |              |
|                                                 |                                      |                                  | YERKES/P4                       | Donation to         | JACKSONVL                 | 27 Jul 1999  |
| 7 Sep 1999                                      | Donation from                        | YERKES/P4                        | JACKSONVL/898051                |                     |                           |              |
| <b>Identification:</b>                          |                                      |                                  |                                 |                     |                           |              |
| <b>Date:</b>                                    | <b>Type:</b>                         | <b>Identifier:</b>               | <b>Location:</b>                | <b>Comments:</b>    |                           |              |
| 27 Mar 1975                                     | House Name                           | BOSONDJO                         |                                 | at YERKES           |                           |              |
| 27 Mar 1975                                     | Global Studbook #                    | 64                               |                                 | at YERKES           |                           |              |
| 27 Mar 1975                                     | House Name                           | BOSONDJO                         |                                 | at JACKSONVL        |                           |              |
| 27 Mar 1975                                     | Global Studbook #                    | 64                               |                                 | at JACKSONVL        |                           |              |
| <b>Measurements:</b>                            |                                      |                                  |                                 |                     |                           |              |
| <b>Date:</b>                                    | <b>Measurement:</b>                  | <b>Value:</b>                    | <b>Units:</b>                   | <b>Comments:</b>    |                           |              |
| 18 Jul 1998                                     | live animal weight                   | 58.57                            | kilogram                        | at JACKSONVL        |                           |              |
| 25 Jul 1998                                     | live animal weight                   | 57.66                            | kilogram                        | at JACKSONVL        |                           |              |
| 1 Aug 1998                                      | live animal weight                   | 57.20                            | kilogram                        | at JACKSONVL        |                           |              |
| 29 Aug 1998                                     | live animal weight                   | 60.00                            | kilogram                        | at JACKSONVL        |                           |              |
| 2 Oct 1998                                      | live animal weight                   | 54.60                            | kilogram                        | at JACKSONVL        |                           |              |
| 19 Dec 1998                                     | live animal weight                   | 52.20                            | kilogram                        | at JACKSONVL        |                           |              |
| 21 May 1999                                     | live animal weight                   | 56.70                            | kilogram                        | at JACKSONVL        |                           |              |
| 25 Jun 1999                                     | live animal weight                   | 52.36                            | kilogram                        | at JACKSONVL        |                           |              |
| 24 Nov 2000                                     | live animal weight                   | 55.57                            | kilogram                        | at JACKSONVL        |                           |              |
| 27 Apr 2002                                     | live animal weight                   | 54.90                            | kilogram                        | at JACKSONVL        |                           |              |
| <b>Sex Information:</b>                         |                                      |                                  |                                 |                     |                           |              |
| <b>Date:</b>                                    | <b>Sex:</b>                          | <b>Comments:</b>                 |                                 |                     |                           |              |
| 1 Jan 1971                                      | Male                                 | at YERKES                        |                                 |                     |                           |              |
| 15 Apr 1998                                     | Male                                 | at JACKSONVL                     |                                 |                     |                           |              |
| <b>Rearing Information:</b>                     |                                      |                                  |                                 |                     |                           |              |
| <b>Date:</b>                                    | <b>Rearing:</b>                      | <b>Comments:</b>                 |                                 |                     |                           |              |
| 15 Apr 1998                                     | Parent                               | at JACKSONVL                     |                                 |                     |                           |              |
| <b>Parents:</b>                                 |                                      |                                  |                                 |                     |                           |              |
| <b>Date:</b>                                    | <b>Parent type:</b>                  | <b>ID:</b>                       | <b>Location:</b>                | <b>Comments:</b>    |                           |              |
| 15 Apr 1998                                     | Sire                                 | WILD                             | ZAIRE                           | while at JACKSONVL  |                           |              |
| 15 Apr 1998                                     | Dam                                  | WILD                             | ZAIRE                           | while at JACKSONVL  |                           |              |

PR00054/146/1003

PR00054  
Page 1 of 1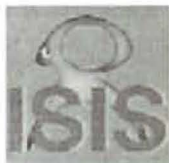Print [Pedigree Report](#)

## International Species Information System

## Specimen SANDIEGOZ/595117

## Names:

| Taxonomic:                   | Common:            | Family:   | Order:   |
|------------------------------|--------------------|-----------|----------|
| <i>Pongo pygmaeus abelii</i> | Sumatran orangutan | Hominidae | Primates |

## Birth Information:

| Sex: | Birth Location: | Birth date: | Birth type:  | Hybrid: | Rearing: |
|------|-----------------|-------------|--------------|---------|----------|
| Male | SANDIEGOZ       | 26 Mar 1995 | Captive born |         | Unknown  |

## Visits:

| Date:       | Aquisition:     | Vendor/LocalID:  | Holder:          | Disposition: | Recipient/LocalID: | Date: |
|-------------|-----------------|------------------|------------------|--------------|--------------------|-------|
| 26 Mar 1995 | Birth, Loan In  | SACRAMNTO/100934 | SANDIEGOZ/595117 |              |                    |       |
| 26 Mar 1995 | Birth, Loan Out | SANDIEGOZ/595117 | SACRAMNTO/100934 |              |                    |       |

## Identification:

| Date:       | Type:          | Identifier: | Location: | Comments:    |
|-------------|----------------|-------------|-----------|--------------|
| 26 Mar 1995 | House Name     | SATU        |           | at SANDIEGOZ |
| 26 Mar 1995 | Transponder ID | 000133CD31  |           | at SANDIEGOZ |

## Sex Information:

| Date:       | Sex: | Comments:    |
|-------------|------|--------------|
| 26 Mar 1995 | Male | at SANDIEGOZ |
| 26 Mar 1995 | Male | at SACRAMNTO |

## Rearing Information:

| Date:       | Rearing: | Comments:    |
|-------------|----------|--------------|
| 26 Mar 1995 | Unknown  | at SACRAMNTO |

## Parents:

| Date:       | Parent type: | ID:           | Location: | Comments:          |
|-------------|--------------|---------------|-----------|--------------------|
| 26 Mar 1995 | Sire         | <u>594030</u> | SANDIEGOZ | while at SANDIEGOZ |
| 26 Mar 1995 | Sire         | <u>100759</u> | COLO SPRG | while at SACRAMNTO |
| 26 Mar 1995 | Dam          | <u>100084</u> | SACRAMNTO | while at SACRAMNTO |
| 26 Mar 1995 | Dam          | <u>593036</u> | SANDIEGOZ | while at SANDIEGOZ |

SIPR

# Specimen Report

Print Pedigree Report

International Species Information System

9 May 2012

**Specimen SANDIEGOZ/594030; COLO SPRG/100759; FRESNO/1573; SD-WAP/594030; ROLLING H/110512**

**Names:**

|                                                    |                                      |                             |                           |
|----------------------------------------------------|--------------------------------------|-----------------------------|---------------------------|
| <b>Taxonomic:</b><br><i>Pongo pygmaeus abeilli</i> | <b>Common:</b><br>Sumatran orangutan | <b>Family:</b><br>Hominidae | <b>Order:</b><br>Primates |
|----------------------------------------------------|--------------------------------------|-----------------------------|---------------------------|

**Birth Information:**

|                     |                                            |                                   |                                    |                                |                            |
|---------------------|--------------------------------------------|-----------------------------------|------------------------------------|--------------------------------|----------------------------|
| <b>Sex:</b><br>Male | <b>Birth Location:</b><br><u>COLO SPRG</u> | <b>Birth date:</b><br>23 Aug 1976 | <b>Birth type:</b><br>Captive born | <b>Hybrid:</b><br>Not a hybrid | <b>Rearing:</b><br>Unknown |
|---------------------|--------------------------------------------|-----------------------------------|------------------------------------|--------------------------------|----------------------------|

**Visits:**

| <b>Date:</b> | <b>Acquisition:</b> | <b>Vendor/LocalID:</b>  | <b>Reported by:</b>     | <b>Disposition:</b> | <b>Recipient/LocalID:</b> | <b>Date:</b> |
|--------------|---------------------|-------------------------|-------------------------|---------------------|---------------------------|--------------|
| 23 Aug 1976  | Birth               |                         | <u>COLO SPRG/100759</u> | Loan Out to         | <u>FRESNO/1573</u>        | 10 Jun 1987  |
| 11 Jun 1987  | Loan In from        | <u>COLO SPRG/100759</u> | <u>FRESNO/1573</u>      | Loan Transfer       | <u>SD-WAP/594030</u>      | 26 Jan 1994  |
|              |                     |                         | <u>COLO SPRG/100759</u> | Loan Out to         | <u>SANDIEGOZ/594030</u>   | 26 Jan 1994  |
| 26 Jan 1994  | Loan In from        | <u>COLO SPRG/100759</u> | <u>SANDIEGOZ/594030</u> |                     |                           |              |
|              |                     |                         | <u>SANDIEGOZ/594030</u> | Loan Transfer       | <u>SD-WAP/594030</u>      | 4 Sep 2002   |
| 4 Sep 2002   | Loan In from        | <u>COLO SPRG/100759</u> | <u>SD-WAP/594030</u>    |                     |                           |              |
|              |                     |                         | <u>SD-WAP/594030</u>    | Loan Transfer       | <u>SANDIEGOZ/594030</u>   | 2 Apr 2003   |
| 2 Apr 2003   | Loan In from        | <u>COLO SPRG/100759</u> | <u>SANDIEGOZ/594030</u> |                     |                           |              |
|              |                     |                         | <u>COLO SPRG/100759</u> | Loan Out to         | <u>ROLLING H/110512</u>   | 18 Apr 2011  |
| 18 Apr 2011  | Loan In from        | <u>COLO SPRG/100759</u> | <u>ROLLING H/110512</u> |                     |                           |              |
| 18 Apr 2011  | Donation from       | <u>COLO SPRG/100759</u> | <u>ROLLING H/110512</u> |                     |                           |              |
|              |                     |                         | <u>COLO SPRG/100759</u> | Donation to         | <u>ROLLING H/110512</u>   | 18 Apr 2011  |

**Identification:**

| <b>Date:</b> | <b>Type:</b>        | <b>Identifier:</b> | <b>Location:</b> | <b>Comments:</b>                                                                                  |
|--------------|---------------------|--------------------|------------------|---------------------------------------------------------------------------------------------------|
| 23 Aug 1976  | House Name          | CLYDE              |                  | at FRESNO                                                                                         |
| 23 Aug 1976  | Global Studbook #   | 1529               |                  | 1529 "International Studbook Number" from ARKS 2 records at FRESNO                                |
| 23 Aug 1976  | Studbook Name       | CLYDE              |                  | at FRESNO                                                                                         |
| 23 Aug 1976  | House Name          | CLYDE              |                  | at COLO SPRG                                                                                      |
| 23 Aug 1976  | Global Studbook #   | 1529               |                  | 1529 "International Studbook Number" from ARKS 2 records at COLO SPRG                             |
| 23 Aug 1976  | Global Studbook #   | 1529               |                  | "International Studbook Number" from ARKS 2 records (from COLO SPRG specimen report) at ROLLING H |
| 11 Jun 1987  | Old Accession #     | 100759             |                  | Old Accession number 100759 from Cheyenne Mountain Zoo. at FRESNO                                 |
| 1 Apr 1993   | Regional Studbook # | 721                | ASMP             | at FRESNO                                                                                         |
| 26 Jan 1994  | House Name          | CLYDE              |                  | at SANDIEGOZ                                                                                      |
| 12 May 2011  | House Name          | Clyde              |                  | at ROLLING H                                                                                      |

**Measurements:**

| <b>Date:</b> | <b>Measurement:</b> | <b>Value:</b> | <b>Units:</b> | <b>Comments:</b>                                                    |
|--------------|---------------------|---------------|---------------|---------------------------------------------------------------------|
| 12 Jun 1987  | live animal weight  | 152           | pound         | at FRESNO                                                           |
| 22 Jun 1992  | live animal weight  | 236.00        | pound         | 236 LB at FRESNO                                                    |
| 25 Jan 1994  | live animal weight  | 2821.0        | pound         | 2821 LBS M at FRESNO                                                |
| 15 Jun 2005  | live animal weight  | 130           | kilogram      | as recorded on Health Problem List from San Diego Zoo. at ROLLING H |
| 8 May 2011   | live animal weight  | 140           | kilogram      | as recorded on ADT filled out by SDZ. at ROLLING H                  |

**Sex Information:**

| <b>Date:</b> | <b>Sex:</b> | <b>Comments:</b> |
|--------------|-------------|------------------|
| 23 Aug 1976  | Male        | at SD-WAP        |
| 23 Aug 1976  | Male        | at SANDIEGOZ     |
| 23 Aug 1976  | Male        | at COLO SPRG     |
| 11 Jun 1987  | Male        | at FRESNO        |



|                             |                     |               |                  |                  |                    |
|-----------------------------|---------------------|---------------|------------------|------------------|--------------------|
| 11 May 2011                 | Male                |               |                  |                  | at ROLLING H       |
| <b>Rearing Information:</b> |                     |               |                  |                  |                    |
| <b>Date:</b>                | <b>Rearing:</b>     |               |                  | <b>Comments:</b> |                    |
| 23 Aug 1976                 | Unknown             |               |                  |                  | at COLO SPRG       |
| 11 Jun 1987                 | Unknown             |               |                  |                  | at FRESNO          |
| 11 May 2011                 | Unknown             |               |                  |                  | at ROLLING H       |
| <b>Parents:</b>             |                     |               |                  |                  |                    |
| <b>Date:</b>                | <b>Parent type:</b> | <b>ID:</b>    | <b>Location:</b> | <b>Comments:</b> |                    |
| 23 Aug 1976                 | Sire                | <u>100220</u> | COLO SPRG        |                  | while at COLO SPRG |
| 23 Aug 1976                 | Dam                 | <u>100222</u> | COLO SPRG        |                  | while at COLO SPRG |

DAM -  
WILD CAUGHT

**Specimen Report**

Print Pedigree Report

International Species Information System

9 May 2012

**Specimen SANDIEGOZ/593036; SACRAMNTO/100084; SD-WAP/593036**

**Names:**

|                              |                    |                |               |
|------------------------------|--------------------|----------------|---------------|
| <b>Taxonomic:</b>            | <b>Common:</b>     | <b>Family:</b> | <b>Order:</b> |
| <i>Pongo pygmaeus abelii</i> | Sumatran orangutan | Hominidae      | Primates      |

**Birth Information:**

|             |                        |                    |                    |                |                 |
|-------------|------------------------|--------------------|--------------------|----------------|-----------------|
| <b>Sex:</b> | <b>Birth Location:</b> | <b>Birth date:</b> | <b>Birth type:</b> | <b>Hybrid:</b> | <b>Rearing:</b> |
| Female      | SUMATRA                | ~ 1960             | Wild Born          | Not a hybrid   | Unknown         |

|              |                     |                        |                     |                     |                           |              |
|--------------|---------------------|------------------------|---------------------|---------------------|---------------------------|--------------|
| <b>Date:</b> | <b>Acquisition:</b> | <b>Vendor/LocalID:</b> | <b>Reported by:</b> | <b>Disposition:</b> | <b>Recipient/LocalID:</b> | <b>Date:</b> |
| 30 Jun 1965  | Purchase from       | GOEBEL<br>G/NONE       | SACRAMNTO/100084    | Loan Out to         | SANDIEGOZ/593036          | 14 Feb 1993  |
| 15 Feb 1993  | Loan In from        | SACRAMNTO/100084       | SANDIEGOZ/593036    | Loan Transfer       | SD-<br>WAP/593036         | 3 Sep 2002   |
| 3 Sep 2002   | Loan In from        | SACRAMNTO/100084       | SD-<br>WAP/593036   | Loan Transfer       | SANDIEGOZ/593036          | 2 Apr 2003   |
| 2 Apr 2003   | Loan In from        | SACRAMNTO/100084       | SANDIEGOZ/593036    |                     |                           |              |
|              |                     |                        | SACRAMNTO/100084    | Death               |                           | 17 Jan 2008  |
|              |                     |                        | SANDIEGOZ/593036    | Death               |                           | 17 Jan 2008  |

**Identification:**

|              |                     |                    |                  |                  |
|--------------|---------------------|--------------------|------------------|------------------|
| <b>Date:</b> | <b>Type:</b>        | <b>Identifier:</b> | <b>Location:</b> | <b>Comments:</b> |
| 29 Jun 1960  | Regional Studbook # | 733                | AZA              | at SACRAMNTO     |
| 30 Jun 1965  | House Name          | Josephine          |                  | at SACRAMNTO     |
| 15 Feb 1993  | House Name          | JOSEPHINE          |                  | at SANDIEGOZ     |
| 15 Feb 1993  | Tattoo              | 733                |                  | at SANDIEGOZ     |

**Sex Information:**

|              |             |                  |
|--------------|-------------|------------------|
| <b>Date:</b> | <b>Sex:</b> | <b>Comments:</b> |
| 1 Jan 1960   | Female      | at SD-WAP        |
| 1 Jan 1960   | Female      | at SANDIEGOZ     |
| 30 Jun 1965  | Female      | at SACRAMNTO     |

**Rearing Information:**

|              |                 |                  |
|--------------|-----------------|------------------|
| <b>Date:</b> | <b>Rearing:</b> | <b>Comments:</b> |
| 30 Jun 1965  | Unknown         | at SACRAMNTO     |

**Parents:**

|              |                     |            |                  |                    |
|--------------|---------------------|------------|------------------|--------------------|
| <b>Date:</b> | <b>Parent type:</b> | <b>ID:</b> | <b>Location:</b> | <b>Comments:</b>   |
| 29 Jun 1960  | Sire                | WILD       | SUMATRA          | while at SACRAMNTO |
| 29 Jun 1960  | Dam                 | WILD       | SUMATRA          | while at SACRAMNTO |

**Death information:**

|                       |                             |                           |                                        |                     |
|-----------------------|-----------------------------|---------------------------|----------------------------------------|---------------------|
| <b>Circumstances:</b> | <b>Carcass Disposition:</b> | <b>Carcass recipient:</b> | <b>Necropsy:</b>                       | <b>Reported By:</b> |
| Other/Unknown         | Unknown                     |                           | Unknown, Unknown                       | at SACRAMNTO        |
| Euthanasia            | Given to an Institution     | LA MUS                    | Cardiovascular, Mechanical Abnormality | at SANDIEGOZ        |
